Osaki et al.

1 **Distinct nociresponsive region in mouse primary somatosensory cortex**

2 Hironobu Osaki<sup>1,\*</sup>, Moeko Kanaya<sup>1</sup>, Yoshifumi Ueta<sup>1</sup>, and Mariko Miyata<sup>1,\*</sup>

3 <sup>1</sup>Division of Neurophysiology, Department of Physiology, Graduate School of

4 Medicine, Tokyo Women's Medical University, Tokyo 162-8666, Japan

5

6

7

8

9

10

11 \*Corresponding authors:

12 Hironobu Osaki, MD, PhD

13 Division of Neurophysiology, Department of Physiology, Graduate School of Medicine,

14 Tokyo Women's Medical University, Kawada-Cho 8-1, Shinjuku-ku, Tokyo 162-8666,

15 Japan.

16 Fax/Tel: +81-3-5269-7413

17 e-mail: [osaki.hironobu@twmu.ac.jp](mailto:osaki.hironobu@twmu.ac.jp)

18

19 Mariko Miyata, MD, PhD

20 Division of Neurophysiology, Department of Physiology, Graduate School of Medicine,

21 Tokyo Women's Medical University, Kawada-Cho 8-1, Shinjuku-ku, Tokyo 162-8666,

22 Japan.

23 Fax/Tel: +81-3-5269-7412

24 e-mail: [mmiyata@twmu.ac.jp](mailto:mmiyata@twmu.ac.jp)

Osaki et al.

25 **Abstract**

26 Nociception, somatic discriminative aspects of pain, is represented in the primary  
27 somatosensory cortex (S1), as is touch, but the separation and the interaction of the two  
28 modalities within S1 remain unclear. Here, we show the spatially-distinct tactile and  
29 nociceptive processing in the granular barrel field (BF) and the adjacent dysgranular  
30 region (Dys) in mouse S1. Simultaneous recording of the multiunit activity across  
31 subregions reveals that Dys responses are selective to noxious input whereas those of  
32 BF are to tactile input. At the single neuron level, nociceptive information is represented  
33 separately from the tactile information in Dys layer 2/3. In contrast, both modalities are  
34 converged in a layer 5 neuron in each region. Interestingly, the two modalities interfere  
35 with each other in both regions. We further demonstrate that Dys, but not BF, activity is  
36 critically involved in neuropathic pain and pain behavior, and thus provide evidence that  
37 Dys is a center specialized for nociception in S1.

Osaki et al.

## 38 **Introduction**

39 The primary somatosensory cortex (S1) plays a central role in tactile information  
40 processing<sup>1</sup>. The tactile representation in S1 is orderly arranged in a somatotopic  
41 fashion<sup>2</sup>. On the other hand, S1 is responsible for somatic discriminative aspects of pain  
42 processing, such as the location, intensity, and quality of pain<sup>3-10</sup>. S1 receives  
43 thalamocortical nociceptive information<sup>11</sup> and relays it to other pain-related cortical  
44 areas, such as the anterior cingulate cortex, which is responsible for the affective aspects  
45 of pain<sup>12,13</sup>. S1 also modulates noxious inputs via the corticotrigeminal<sup>14</sup> and  
46 corticospinal<sup>15</sup> pathways under both acute and chronic pain conditions. Therefore, S1  
47 can be viewed as a network hub of pain processing and a target for interventions to  
48 control pain. However, it remains unclear how S1 processes nociceptive information  
49 and somatic tactile information distinctively.

50 Mouse S1 is divided into two subregions based on the cytoarchitecture: the  
51 granular region known as the barrel field (BF), which is identified by unique clusters of  
52 layer (L4) neurons, and the adjacent dysgranular region (Dys), which has poorly defined  
53 L4<sup>6,16</sup>. The two subregions are thought to be functionally different. For instance, BF is  
54 the center for processing tactile input from whiskers<sup>17-19</sup>, while Dys receives  
55 proprioceptive input by deep muscle stimulation or joint rotation<sup>20,21</sup>. In nociception, BF  
56 neurons in deeper layers receive noxious inputs<sup>11,22,23</sup>. Similarly, Dys neurons in the  
57 deeper layers respond to noxious pinching and pruriceptive inputs<sup>24,25</sup>. However, it is  
58 still unclear how each subregion processes nociceptive information with/without tactile  
59 information because a direct comparison between the two subregions is lacking.

60 Here, we found that nociceptive and tactile information is separately  
61 represented in Dys and BF, respectively, by simultaneous recording from both

Osaki et al.

62 subregions. Dys was also predominantly activated under neuropathic pain condition.  
63 Reflecting the spatially-distinct representation of nociception, optogenetic inhibition of  
64 neuronal activity of Dys, but not BF, reduced pain behavior. Thus, we clarified a distinct  
65 functional role in nociceptive processing of Dys, which generates proper escape  
66 behavior from noxious inputs and is a potential target for pain relief.

Osaki et al.

## 67 **Results**

### 68 **Nociceptive information is mainly processed in Dys**

69 First, we sought to identify the area responding to noxious input in S1 by observing the  
70 expression of c-Fos, a neural activity marker, after capsaicin was injected into the  
71 whisker pad (Fig. 1a, b). The number of c-Fos-positive neurons increased significantly  
72 in L4 of Dys after capsaicin injection ( $P = 1.2 \times 10^{-5}$ ) but not in L4 of BF ( $P = 0.97$ ,  
73 Fig. 1b and Supplementary Table 1). The noxious stimulus-induced increase in L4 c-  
74 Fos-positive neurons was also detected in the hindpaw area of Dys when formalin was  
75 injected into the hindpaw (Extended Data Fig. 1). Thus, Dys neurons responded to  
76 noxious input in a somatotopic manner.

77 Next, we compared response properties between Dys and BF, during a noxious  
78 heat stimulus (noxH; 45–50°C) applied to the whisker pad (Fig. 1c, d). We recorded  
79 multiunit activities (MUA) simultaneously from Dys and BF neurons in layer 2/3  
80 (L2/3), L4, and layer 5 (L5) (Fig. 1e). The MUA in Dys increased in all of the recorded  
81 layers when the temperature of the Peltier device reached a noxious range (45–50°C)  
82 (Fig. 1e), while the responses differed among the layers in BF; MUA to noxH did not  
83 increase in BF L2/3 or L4 but increased slightly in L5 (Fig. 1e, bottom charts). To  
84 evaluate the selectivity to noxH, the signal-to-noise ratio (S/N; see Methods) was  
85 calculated. The response to noxH (labeled S, beige shaded region in Fig. 1e) was used  
86 as the signal, and the response to an innocuous heat range (33–45°C, labeled N, grey  
87 shaded region in Fig. 1e) was used as the noise. When comparing the S/N values for the  
88 same layers between Dys and BF ( $n = 8$  animals), the S/N in Dys was significantly  
89 higher than that in BF (Fig. 1f) in L2/3 and L5 by a multiple-comparisons test ( $P = 0.9$ ).

Osaki et al.

90 Although L4 neurons did not show the significant difference in Figure. 1f, the  
91 comparisons of simultaneously recorded neural pairs showed that L4 neurons in Dys  
92 were significantly more selective to noxH than those in BF (Extended Data Fig. 2,  $P =$   
93 0.0056). Within BF, the S/N was significantly higher in L5 than L2/3 ( $P = 0.025$ , Fig.  
94 1e). This difference between layers for noxH responses in BF was reported in the  
95 previous studies<sup>22,23,26</sup>. Together, the MUA analyses indicate that Dys responded more  
96 selectively to noxH than BF (Fig. 1g).

97 We next assessed response selectivity to tactile stimuli by comparing the S/Ns  
98 in response to whisker deflection (see Methods). Neurons in BF responded precisely to  
99 the onset of each whisker deflection, whereas those in Dys did not (Extended Data Fig.  
100 3a, b). The S/Ns to whisker deflection were higher in BF than Dys in each layer  
101 (Extended Data Fig. 2, right, and 3c), indicating that the selectivity to tactile stimuli was  
102 higher in BF than Dys (Extended Data Fig. 3d).

103

104 **Nociceptive information is processed separately from tactile information in Dys**

105 **L2/3**

106 The results of the MUA analysis indicated that nociceptive information was mainly  
107 processed in Dys rather than BF (Fig. 1). Thus, we examined the modality specificity of  
108 single neurons in the two subregions. The peristimulus time histograms (PSTHs) of the  
109 well-isolated neurons in L2/3 simultaneously recorded from the two subregions are  
110 shown in Fig 2a; recorded neurons were sorted by the time of peak response to a heat  
111 stimulus. In Dys, the steepness of peak responses to a heat stimulus increased within the  
112 noxious heat range, indicating that many neurons responded to the noxious heat,  
113 whereas a few neurons responded in BF L2/3 (white boxes in Fig. 2a, left column). On

Osaki et al.

114 the other hand, many BF neurons, but only a few Dys neurons, in L2/3 responded well  
115 to tactile stimuli (whisker deflections). Notably, the noxious heat-responding neurons in  
116 Dys L2/3 did not respond to the tactile stimuli (white box in Fig. 2a, right column).

117 In L5, the steepness of peak responses to heat stimulus increased within the  
118 noxious heat range in both regions (white boxes in Fig. 2b, left column). In contrast to  
119 that in L2/3, many nociceptive neurons in L5 of both Dys and BF responded to tactile  
120 stimuli (white boxes in Fig. 2b, right column). Thus, Dys neurons in L2/3 process  
121 mainly nociceptive information separately from tactile information, whereas neurons in  
122 L5 of both subregions tend to respond to tactile and noxious inputs.

123 To quantify these observations, we classified the neurons into nociceptive,  
124 tactile, integrative, and nonselective types according to S/Ns to noxH and tactile stimuli  
125 (Fig. 2c and Extended Data Fig. 4). The distributions of the S/Ns clustered according to  
126 the median S/Ns for all recorded neurons (1.81 for nociceptive and 1.46 for tactile,  
127 Extended Data Fig. 4b, d). In addition, normalized PSTHs of neurons classified  
128 according to these values represented the characteristics of each neuron group (Fig. 2c):  
129 nociceptive-type neurons responded to noxious heat but not to the tactile stimulus,  
130 tactile-type neurons responded to tactile input but not to noxious heat, and integrative-  
131 type neurons responded to both stimuli. Therefore, we used the median S/Ns as the  
132 cutoff values for classification. According to this classification, the proportion of  
133 neurons of each type in each subregion was calculated (Fig. 2d). Consistent with the  
134 population PSTH (Fig. 2a, b), in L2/3, nociceptive information was processed  
135 separately in Dys while tactile information was processed in BF. On the other hand,  
136 nociceptive and tactile information tended to be integrated at L5 neurons of both  
137 subregions (Fig. 2d, bottom).

Osaki et al.

138           In the population PSTHs (Fig. 2a, b), the onset of the response to heat stimuli  
139 varied across neurons, indicating that they responded to various temperatures.  
140 Therefore, we examined the thermal threshold of neurons in response to the onset of a  
141 heat stimulus (Fig. 2e). The histogram of the thermal thresholds of L2/3 neurons shows  
142 that many Dys neurons started to respond near noxious temperatures (42–44°C). By  
143 contrast, BF neurons responded to a broad range of temperatures ( $P = 0.013$ ),  
144 suggesting that BF neurons encode cutaneous temperature<sup>27,28</sup>. In L5, the distribution in  
145 Dys was sharply tuned to a noxious heat range, although the difference between the  
146 distributions for Dys and BF was insignificant ( $P = 0.056$ ). These data demonstrate a  
147 preference of Dys neurons for noxious heat.

148           The averaged PSTHs (Fig. 2c) show that the responses of tactile and  
149 nonselective neurons were suppressed by noxH. Because the S/Ns of these neurons  
150 were  $<1$ , we estimated the proportion of neurons suppressed by noxH in each region. In  
151 L2/3 of BF, 60% of neurons were suppressed by noxH. This proportion is significantly  
152 larger than that in Dys (22%,  $P = 5.4 \times 10^{-8}$ , Fig. 2f). In L5, on the other hand, the  
153 proportion of neurons that were suppressed by tactile stimuli was larger in Dys than BF  
154 ( $P = 0.048$ , Fig. 2f). These data may provide the neural mechanism underlying the  
155 interference between touch and pain<sup>29-31</sup>.

156           In summary, the data show that nociceptive information is processed separately  
157 from tactile information in Dys. The majority of nociresponsive neurons in BF were the  
158 integrative type in both L2/3 and L5. The difference in thermal thresholds indicates that  
159 Dys processes noxious heat input, and BF is responsible for temperature coding.  
160 Furthermore, the modalities interacted with each other in a way that each suppresses the  
161 other's region.



Osaki et al.

162

163 **Dys is involved in neuropathic pain**

164 S1 is also activated under chronic pain condition<sup>12,13,32,33</sup>. Thus, we next investigated  
165 how cortical representation would shift from tactile to nociceptive information in S1  
166 during the developing of tactile allodynia induced by nerve injury. We ligated the  
167 infraorbital nerve (ION) as a trigeminal neuralgia model. For ION ligation, we used an  
168 absorbable surgical thread (see Methods), which enabled us to observe the S1 regions  
169 responding to tactile stimulus both during nerve injury and after recovery (Fig. 3a, b).  
170 Intrinsic signals in BF induced by whisker stimulation were observed before ligation  
171 (Fig. 3b, left). At postoperative day 7 (POD 7), when the tensile strength of the surgical  
172 thread is reduced to ~50%, the signal in BF disappeared but was enhanced in the  
173 adjacent region (Fig. 3b, middle). Subsequent histological analyses confirmed that the  
174 adjacent region was Dys (Fig. 3c and Extended Data Fig. 5). At POD 21, during  
175 recovery from the ligation when the tensile strength is reduced to 0% of the maximum  
176 strength, the signal in BF reappeared (Fig. 3b, right). In population analyses, ION  
177 ligation increased the signal in Dys (Fig. 3d). Consistent with this, the number of c-Fos-  
178 positive neurons in Dys was significantly increased after ION ligation (Extended Data  
179 Fig. 6a–c). Moreover, mechanical allodynia at the whisker pad was also observed  
180 (Extended Data Fig. 6d, e), suggesting that Dys may be related to the peripheral nerve  
181 injury-induced neuropathic pain. The activated region changed dynamically according  
182 to the extent of peripheral nerve injury. This suggests that the activation of Dys and the  
183 deactivation of BF reflect the cortical representation of pain.

184

Osaki et al.

185 **Dys is involved in generating pain behavior**

186 Finally, we examined whether Dys is involved in pain behavior, such as escape from  
187 harmful stimuli. For this, we monitored the behaviors of head-restrained animals freely  
188 moving on a spherical treadmill<sup>34</sup> in response to an innocuous or noxious infrared (IR)  
189 laser applied to the left whisker pad (Fig. 4a). Application of the IR laser for 500 and  
190 1,500 ms increases the skin temperature to 39°C and 52°C, respectively<sup>35</sup>, which we  
191 thus refer to as innocuous heat (innH) and noxH, respectively. In response to noxH, the  
192 traveling speed increased until 5 s after the onset of the IR laser stimulus as the mice  
193 attempted to escape from noxious input (Fig. 4b–d and Extended Data Fig. 7a). The  
194 animals also exhibited eye blink and tightening (Extended Data Fig. 7a), which are  
195 considered expressions of pain<sup>36-38</sup>. Thus, this system was suitable for quantifying pain  
196 behaviors in response to noxH.

197 Using this system, we determined the effect of modulating Dys activity on pain  
198 behavior. We monitored pain behaviors induced by noxH during optogenetic  
199 suppression of various cortical areas, including Dys (Fig. 4e). For these experiments, we  
200 did not assess eye blink and tightening, which involve reflex actions via the brainstem  
201 or the cerebellum<sup>39</sup>. We used a transgenic line that expresses channelrhodopsin-2  
202 (ChR2)-EYFP in parvalbumin (PV)-expressing interneurons (PV-Cre × Ai32), and  
203 photoactivated PV interneurons to inhibit cortical pyramidal neurons locally<sup>40</sup>(Fig. 4e).  
204 Photoinhibition of Dys significantly decreased the escape speed in response to noxH  
205 (for 1.5 to 2 s in position 3 (P3) and P4,  $P < 0.05$ ; and for 2 to 2.5 s for P4,  $n = 6$ , Fig.  
206 4f); photoinhibition of other S1 regions, such as BF or paw regions, had no effect ( $P >$   
207  $0.05$ , Extended Data Fig. 8). Similar trends were observed for the maximal speed ( $P <$   
208  $0.01$  at P3 and P4; not significant at other positions, Fig. 4g), and for changes in the

Osaki et al.

209 escape direction and distance (Extended Data Fig. 7b). In control mice that did not  
210 express ChR2, blue laser stimulation did not affect the escape speed (Extended Data  
211 Fig. 9). These results indicate that optogenetic local suppression of Dys neurons reduced  
212 noxH evoked pain behaviors.

213           Conversely, pain behaviors were also affected by Dys activation. Because the  
214 medial posterior nucleus (Po) neurons are thought to bring nociceptive information from  
215 the thalamus to S1<sup>11</sup>, we confirmed the connection from Po neurons to Dys by retro- and  
216 antero-grade tracers (Extended Data Fig. 10)<sup>16</sup> and utilised mice with virus-induced  
217 expression of ChR2 (AAV9-hSyn-ChR2(H134R)-EYFP) in Po neurons<sup>16</sup>.  
218 Photoactivation of Dys (Fig. 4h) in response to innH resulted in treadmill speed profiles  
219 resembling those in response to the noxH condition (Fig. 4i). Similarly, the maximal  
220 speed with innH condition paired with Dys photoactivation was not different from that  
221 in response to the noxH condition ( $P = 0.99$ , Fig. 4j). Photoactivation of Dys increased  
222 the escape speed at 2.5–3 s after innH onset compared with that without photoactivation  
223 ( $P < 0.001$ ,  $n = 3$ , Extended Data Fig. 11c, d). Notably, this same increase was observed  
224 with ChR2 activation of Dys in the absence of innH ( $P = 0.016$ , Extended Data Fig.  
225 11b). Similar trends were also observed in the escape direction and distance (Extended  
226 Data Fig. 7c). This suggests that ChR2-mediated photoactivation of Dys enhanced pain  
227 behaviors. In control mice that did not express ChR2 in Po, blue laser stimulation had  
228 no effect (Extended Data Fig. 12). In summary, the optogenetic studies demonstrate that  
229 Dys activation induces pain behaviors in response to innH, whereas Dys inhibition  
230 reduces them, revealing the role of Dys in generating pain behavior.

Osaki et al.

## 231 **Discussion**

232 The results of this study reveal that Dys shows much higher selectivity to noxious heat  
233 input, whereas BF is more selective to tactile input. In particular, nociceptive  
234 information is processed separately from tactile information in Dys L2/3. Dys is also  
235 responsive to neuropathic pain. Reflecting the spatially-distinct representation of  
236 nociception, optogenetic suppression of Dys activity reduced noxious heat-evoked pain  
237 behaviors, whereas the same manipulation in BF showed no behavioral effect. These  
238 results indicate that Dys is mainly involved in nociception and in generating pain  
239 behaviors in S1.

240

## 241 **Separation and interaction of nociceptive and tactile processing**

242 Previous studies have reported that nociresponsive cortical neurons are located in the  
243 deeper layers of BF<sup>11,22,23</sup> and Dys<sup>24</sup>, but the functional differences between the two  
244 subregions remain unknown. Here, we demonstrate that Dys and BF have clearly  
245 segregated roles in nociceptive and tactile processing, especially in L2/3. Our  
246 neurophysiological data further show that noxH input suppresses neural activity in BF  
247 L2/3. This suppression may be the neural basis for disrupting the acuity of tactile  
248 sensation during pain<sup>29,30</sup>.

249 In contrast to that in L2/3, the segregation of nociceptive and tactile  
250 information processing was less clear in L5, with larger proportions of integrative  
251 neurons in both regions. However, the preference for tactile stimuli in L5 BF neurons  
252 was maintained; BF neurons showed greater selectivity to tactile input than Dys neurons  
253 (Extended Data Fig. 4c), while tactile input tended to suppress neural activity in Dys  
254 (Fig. 2f). Because L5 neurons are suggested to modulate nociceptive input through the

Osaki et al.

255 corticofugal pathway<sup>14,15</sup>, BF L5 neurons might relate to touch-induced pain relief under  
256 normal conditions<sup>31</sup>, whereas Dys L5 neurons might contribute to mechanical allodynia  
257 (Fig. 3).

258         The notably finding in the present study is that Dys, but not BF, is involved in  
259 generating pain behavior (Fig.4). Several lines of anatomical evidence suggest that Dys  
260 closely relates to motor function. For instance, Dys receives proprioceptive inputs via  
261 Po<sup>16,20,21</sup> and projects to the primary motor cortex<sup>41</sup>. Therefore, it is expected that  
262 somatic nociceptive information may integrate with proprioception in Dys. This  
263 combined information may exert influence over the motor pathway, which leads to  
264 proper escape behavior from noxious inputs. Because the descending projections from  
265 Dys terminate in areas distinguishable from those from S1 cutaneous areas<sup>42</sup>, the  
266 functional differences of the outputs from Dys and BF should be examined in more  
267 detail in future studies.

268

### 269 **Possibility of S1 intervention for pain relief based on S1 functional structure**

270 Although deep brain stimulation of the somatosensory thalamus, the ventral  
271 posterolateral nucleus and ventral posteromedial nucleus, had been utilized to treat  
272 chronic pain<sup>43</sup>, it is not currently used as a medical treatment because of its limited  
273 therapeutic effect<sup>44,45</sup>. The reason why the limitation may be the fact that the sensory  
274 pathways are not selectively stimulated. Therefore, we guess that the selective inhibition  
275 of nociresponsive region in S1 could overcome it and have more therapeutic effects.

276         Neurons in primate area 3a, which is also a dysgranular region in cytoarchitecture<sup>46</sup>,  
277 responds to noxious<sup>46,47</sup> and proprioceptive inputs<sup>48</sup>. Thus, primate area 3a could be an  
278 evolutionally homologue to rodent Dys. Considering Dys inhibition reduced pain

Osaki et al.

279 behavior (Fig. 4), inhibition of area 3a might work as pain relief. However, area 3a is  
280 buried in the fundus of the central sulcus in humans<sup>49</sup>, the selective intervention of area  
281 3a is challenging and needs to be resolved for effective treatment of chronic pain in the  
282 future<sup>46,47</sup>. Nevertheless, our results provide evidence that the distinctive nociceptive  
283 region in S1 is a potential therapeutic target for pain relief.

284

Osaki et al.

285 **Acknowledgments**

286 We thank Sachie Sekino and Yumi Tani for their excellent technical assistance. This  
287 research was supported by JSPS KAKENHI grant numbers JP15K21387, JP15H01667,  
288 JP17H05912, JP18K14854, and The Uehara Memorial Foundation to H.O. This  
289 research was also partially supported by JSPS KAKENHI grant numbers JP20H05481,  
290 JP20H05916, JP20K21508, JP17H05752 and the SHISEIKAI Scholarship Fund for  
291 Basic Researcher of Medical Science, Keiko Watanabe Award to M.M. and the program  
292 for Brain Mapping by Integrated Neurotechnologies for Disease Studies  
293 (Brain/MINDS) from the Japan Agency for Medical Research and Development,  
294 AMED, under grant number JP19dm0207057.

295

296 **Author contributions**

297 HO and MM designed the experiments. HO, MK, and YU performed the experiments  
298 and analyzed the data. HO and MM wrote the original draft.

299

300 **Competing interests**

301 All authors have no competing interest to declare.

302

303

## 304 **References**

- 305 1 Iwamura, Y. Hierarchical somatosensory processing. *Current Opinion in Neurobiology* **8**, 522-  
306 528, doi:10.1016/S0959-4388(98)80041-X (1998).
- 307 2 Penfield, W. & Boldrey, E. SOMATIC MOTOR AND SENSORY REPRESENTATION IN THE  
308 CEREBRAL CORTEX OF MAN AS STUDIED BY ELECTRICAL STIMULATION. *Brain* **60**,  
309 389-443, doi:10.1093/brain/60.4.389 (1937).
- 310 3 Apkarian, V. A., Bushnell, C. M., Treede, R.-D. & Zubieta, J.-K. Human brain mechanisms of  
311 pain perception and regulation in health and disease. *European Journal of Pain* **9**, 463-463,  
312 doi:10.1016/j.ejpain.2004.11.001 (2005).
- 313 4 Kenshalo, D. R. & Isensee, O. Responses of primate SI cortical neurons to noxious stimuli.  
314 *Journal of Neurophysiology* **50**, 1479-1496, doi:10.1152/jn.1983.50.6.1479 (1983).
- 315 5 Bushnell, M. C. *et al.* Pain perception: Is there a role for primary somatosensory cortex?  
316 *Proceedings of the National Academy of Sciences* **96**, 7705-7709, doi:10.1073/pnas.96.14.7705  
317 (1999).
- 318 6 Wimmer, V. C., Bruno, R. M., de Kock, C. P. J., Kuner, T. & Sakmann, B. Dimensions of a  
319 projection column and architecture of VPM and POm axons in rat vibrissal cortex. *Cerebral*  
320 *cortex (New York, N.Y. : 1991)* **20**, 2265-2276, doi:10.1093/cercor/bhq068 (2010).
- 321 7 Chen, L. M., Friedman, R. M. & Roe, A. W. Area-specific representation of mechanical  
322 nociceptive stimuli within SI cortex of squirrel monkeys. *Pain* **141**, 258-268,  
323 doi:10.1016/j.pain.2008.11.018 (2009).
- 324 8 Vierck, C. J., Whitsel, B. L., Favorov, O. V., Brown, A. W. & Tommerdahl, M. Role of primary  
325 somatosensory cortex in the coding of pain. *PAIN®* **154**, 334-344,  
326 doi:10.1016/j.pain.2012.10.021 (2013).
- 327 9 Treede, R.-D., Kenshalo, D. R., Gracely, R. H. & Jones, A. K. P. The cortical representation of  
328 pain. *Pain* **79**, 105-111, doi:10.1016/s0304-3959(98)00184-5 (1999).
- 329 10 Hofbauer, R. K., Rainville, P., Duncan, G. H. & Bushnell, C. M. Cortical Representation of the  
330 Sensory Dimension of Pain. *Journal of Neurophysiology* **86**, 402-411,  
331 doi:10.1152/jn.2001.86.1.402 (2001).
- 332 11 Frangeul, L. *et al.* Specific activation of the paralemniscal pathway during nociception.  
333 *European Journal of Neuroscience* **39**, 1455-1464, doi:10.1111/ejn.12524 (2014).
- 334 12 Eto, K. *et al.* Inter-regional Contribution of Enhanced Activity of the Primary Somatosensory  
335 Cortex to the Anterior Cingulate Cortex Accelerates Chronic Pain Behavior. *The Journal of*  
336 *Neuroscience* **31**, 7631-7636, doi:10.1523/JNEUROSCI.0946-11.2011 (2011).
- 337 13 Singh, A. *et al.* Mapping Cortical Integration of Sensory and Affective Pain Pathways. *Current*  
338 *biology : CB*, doi:10.1016/j.cub.2020.02.091 (2020).



Osaki et al.

- 339 14 Castro, A. *et al.* Cortical Regulation of Nociception of the Trigeminal Nucleus Caudalis. *The*  
340 *Journal of Neuroscience* **37**, 11431-11440, doi:10.1523/jneurosci.3897-16.2017 (2017).
- 341 15 Liu, Y. *et al.* Touch and tactile neuropathic pain sensitivity are set by corticospinal projections.  
342 *Nature* **561**, 547-550, doi:10.1038/s41586-018-0515-2 (2018).
- 343 16 Koralek, K.-A., Jensen, K. F. & Killackey, H. P. Evidence for two complementary patterns of  
344 thalamic input to the rat somatosensory cortex. *Brain Research* **463**, 346-351, doi:10.1016/0006-  
345 8993(88)90408-8 (1988).
- 346 17 Petersen, C. C. H. Sensorimotor processing in the rodent barrel cortex. *Nature Reviews*  
347 *Neuroscience* **20**, 533-546, doi:10.1038/s41583-019-0200-y (2019).
- 348 18 Kleinfeld, D. & Deschênes, M. Neuronal basis for object location in the vibrissa scanning  
349 sensorimotor system. *Neuron* **72**, 455-468, doi:10.1016/j.neuron.2011.10.009 (2011).
- 350 19 Estebanez, L., Férézou, I., Ego-Stengel, V. & Shulz, D. E. Representation of tactile scenes in the  
351 rodent barrel cortex. *Neuroscience* **368**, 81-94, doi:10.1016/j.neuroscience.2017.08.039 (2018).
- 352 20 Chapin, J. K. & Lin, C. S. Mapping the body representation in the SI cortex of anesthetized and  
353 awake rats. *Journal of Comparative Neurology* **229**, doi:10.1002/cne.902290206 (1984).
- 354 21 Welker, W., Sanderson, K. J. & Shambes, G. M. Patterns of afferent projections to transitional  
355 zones in the somatic sensorimotor cerebral cortex of albino rats. *Brain Research* **292**, 261-267,  
356 doi:10.1016/0006-8993(84)90762-5 (1984).
- 357 22 Lamour, Y., Guilbaud, G. & Willer, J. C. Rat somatosensory (Sml) cortex: II. Laminar and  
358 columnar organization of noxious and non-noxious inputs. *Experimental Brain Research* **49**, 46-  
359 54, doi:10.1007/bf00235540 (1983).
- 360 23 Sun, J. J., Yang, J. W. & Shyu, B. C. Current source density analysis of laser heat-evoked intra-  
361 cortical field potentials in the primary somatosensory cortex of rats. *Neuroscience* **140**, 1321-  
362 1336, doi:10.1016/j.neuroscience.2006.03.018 (2006).
- 363 24 Khasabov, S. G. *et al.* Responses of neurons in the primary somatosensory cortex to itch- and  
364 pain-producing stimuli in rats. *Journal of neurophysiology*, doi:10.1152/jn.00038.2020 (2020).
- 365 25 Favorov, O. V. *et al.* A newly identified nociresponsive region in the Transitional Zone (TZ) in  
366 rat sensorimotor cortex. *Brain Research*, doi:10.1016/j.brainres.2019.04.028 (2019).
- 367 26 Kalliomaäki, J., Weng, H.-R., Nilsson, H.-J. r. & Schouenborg, J. Nociceptive C fibre input to the  
368 primary somatosensory cortex (SI). A field potential study in the rat. *Brain Research* **622**, 262-  
369 270, doi:10.1016/0006-8993(93)90827-a (1993).
- 370 27 Bokinić, P., Zampieri, N., Lewin, G. R. & Poulet, J. F. A. The neural circuits of thermal  
371 perception. *Current Opinion in Neurobiology* **52**, 98-106, doi:10.1016/j.conb.2018.04.006  
372 (2018).
- 373 28 Paricio-Montesinos, R. *et al.* The Sensory Coding of Warm Perception. *Neuron*,  
374 doi:10.1016/j.neuron.2020.02.035 (2020).

Osaki et al.

- 375 29 Apkarian, V. A., Stea, R. A. & Bolanowski, S. J. Heat-Induced Pain Diminishes Vibrotactile  
376 Perception: A Touch Gate. *Somatosensory & motor research* **11**, 259-267,  
377 doi:10.3109/08990229409051393 (2009).
- 378 30 Adamczyk, W. M., Saulicz, O., Saulicz, E. & Luedtke, K. Tactile acuity (dys)function in acute  
379 nociceptive low back pain. *PAIN* **159**, 427-436, doi:10.1097/j.pain.0000000000001110 (2018).
- 380 31 Inui, K., Tsuji, T. & Kakigi, R. Temporal Analysis of Cortical Mechanisms for Pain Relief by  
381 Tactile Stimuli in Humans. *Cerebral Cortex* **16**, 355-365, doi:10.1093/cercor/bhi114 (2006).
- 382 32 Kim, S., Eto, K. & Nabekura, J. Synaptic structure and function in the mouse somatosensory  
383 cortex during chronic pain: in vivo two-photon imaging. *Neural plasticity* **2012**, 640259,  
384 doi:10.1155/2012/640259 (2012).
- 385 33 Moisset, X. & Bouhassira, D. Brain imaging of neuropathic pain. *NeuroImage* **37**,  
386 doi:10.1016/j.neuroimage.2007.03.054 (2007).
- 387 34 Dombeck, D. A., Khabbaz, A. N., Collman, F., Adelman, T. L. & Tank, D. W. Imaging Large-  
388 Scale Neural Activity with Cellular Resolution in Awake, Mobile Mice. *Neuron* **56**, 43-57,  
389 doi:10.1016/j.neuron.2007.08.003 (2007).
- 390 35 Plaghki, L. & Mouraux, A. How do we selectively activate skin nociceptors with a high power  
391 infrared laser? Physiology and biophysics of laser stimulation. *Neurophysiologie*  
392 *Clinique/Clinical Neurophysiology* **33**, 269-277, doi:10.1016/j.neucli.2003.10.003 (2003).
- 393 36 Cho, C. *et al.* Evaluating analgesic efficacy and administration route following craniotomy in  
394 mice using the grimace scale. *Scientific reports* **9**, 359, doi:10.1038/s41598-018-36897-w  
395 (2019).
- 396 37 Deuis, J. R., Dvorakova, L. S. & Vetter, I. Methods Used to Evaluate Pain Behaviors in Rodents.  
397 *Frontiers in Molecular Neuroscience* **10**, 284, doi:10.3389/fnmol.2017.00284 (2017).
- 398 38 Langford, D. J. *et al.* Coding of facial expressions of pain in the laboratory mouse. *Nature*  
399 *methods* **7**, 447-449, doi:10.1038/nmeth.1455 (2010).
- 400 39 McCormick, D. A., Steinmetz, J. E. & Thompson, R. F. Lesions of the inferior olivary complex  
401 cause extinction of the classically conditioned eyeblink response. *Brain Research* **359**, 120-130,  
402 doi:10.1016/0006-8993(85)91419-2 (1985).
- 403 40 Sato, T. R. *et al.* Interhemispherically dynamic representation of an eye movement-related  
404 activity in mouse frontal cortex. *eLife* **8**, doi:10.7554/elife.50855 (2019).
- 405 41 Kim, U. & Lee, T. Intra-areal and corticocortical circuits arising in the dysgranular zone of rat  
406 primary somatosensory cortex that processes deep somatic input. *The Journal of comparative*  
407 *neurology* **521**, 2585-2601, doi:10.1002/cne.23300 (2013).
- 408 42 Lee, T. & Kim, U. Descending projections from the dysgranular zone of rat primary  
409 somatosensory cortex processing deep somatic input. *The Journal of Comparative Neurology*  
410 **520**, 1021-1046, doi:10.1002/cne.22767 (2012).

Osaki et al.

- 411 43 Hosobuchi, Y., Adams, J. E. & Rutkin, B. Chronic Thalamic Stimulation for the Control of  
412 Facial Anesthesia Dolorosa. *Archives of Neurology* **29**, 158-161,  
413 doi:10.1001/archneur.1973.00490270040005 (1973).
- 414 44 Keifer, O., Riley, J. P. & Boulis, N. M. Deep Brain Stimulation for Chronic Pain Intracranial  
415 Targets, Clinical Outcomes, and Trial Design Considerations. *Neurosurgery Clinics of North*  
416 *America* **25**, 671-692, doi:10.1016/j.nec.2014.07.009 (2014).
- 417 45 Farrell, S., Green, A. & Aziz, T. The Current State of Deep Brain Stimulation for Chronic Pain  
418 and Its Context in Other Forms of Neuromodulation. *Brain Sciences* **8**, 158,  
419 doi:10.3390/brainsci8080158 (2018).
- 420 46 Whitsel, B. L., Vierck, C. J., Waters, R. S., Tommerdahl, M. & Favorov, O. V. Contributions of  
421 Nociresponsive Area 3a to Normal and Abnormal Somatosensory Perception. *The journal of*  
422 *pain : official journal of the American Pain Society*, doi:10.1016/j.jpain.2018.08.009 (2018).
- 423 47 Chen, L. Cortical Representation of Pain and Touch: Evidence from Combined Functional  
424 Neuroimaging and Electrophysiology in Non-human Primates. *Neuroscience Bulletin* **34**, 165-  
425 177, doi:10.1007/s12264-017-0133-2 (2018).
- 426 48 Iwamura, Y., Tanaka, M., Sakamoto, M. & Hikosaka, O. Functional subdivisions representing  
427 different finger regions in area 3 of the first somatosensory cortex of the conscious monkey.  
428 *Experimental Brain Research* **51**, 315-326, doi:10.1007/bf00237868 (1983).
- 429 49 Geyer, S., Schleicher, A. & Zilles, K. Areas 3a, 3b, and 1 of Human Primary Somatosensory  
430 Cortex 1. Microstructural Organization and Interindividual Variability. *NeuroImage* **10**, 63-83,  
431 doi:10.1006/nimg.1999.0440 (1999).
- 432

Osaki et al., (Figures)

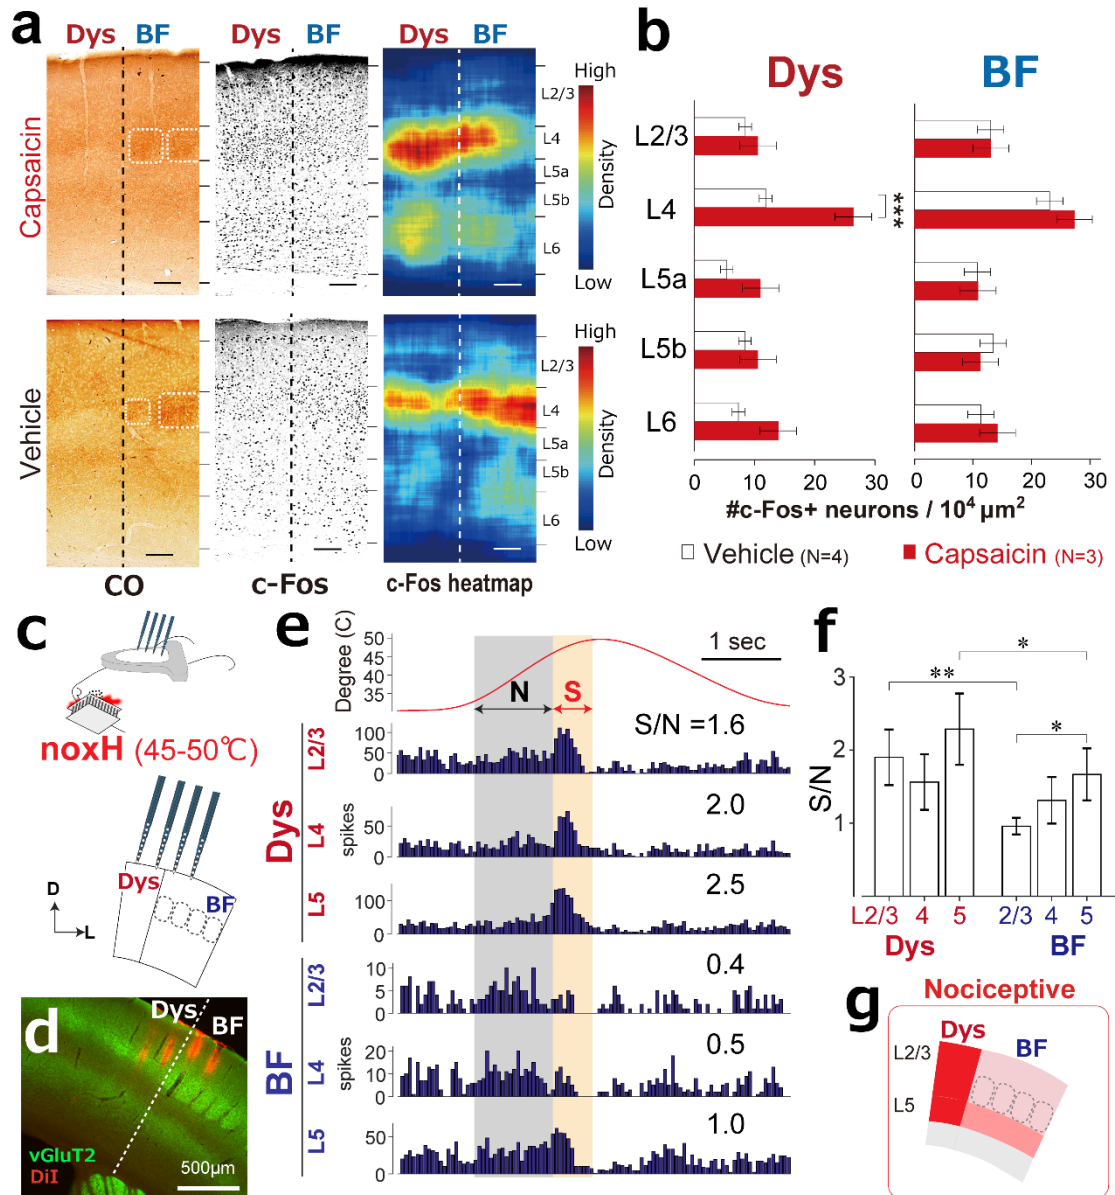

**Figure 1**

**Dysgranular region in S1 responds to noxious input.**

**a**, Neurons in the dysgranular region (Dys) were activated by injecting capsaicin into the whisker pad. *Left*, cytochrome c oxidase (CO) staining identified the boarder of Dys and the whisker barrel field (BF). *Middle*, c-Fos immunostaining of adjacent slices is shown. *Right*, Heat maps indicate the density of c-Fos-positive neurons. Scale bars, 100  $\mu\text{m}$ . **b**, Capsaicin injection into the whisker pad increased the number of c-Fos-positive neurons in Dys L4 (mean  $\pm$  SEM; \*\*\* $P = 1.2 \times 10^{-5}$ , one-way ANOVA followed by Tukey–Kramer test) but not in BF L4 ( $P = 0.97$ ). **c**, Setup for simultaneous recordings from Dys and BF after application of noxious heat stimulus (noxH) to whisker pad. **d**, Brain section showing electrode tracks (DiI, red). vGluT2 (green) staining shows

Osaki et al., (Figures)

12 the border of Dys and BF. **e**, Peristimulus time histograms of representative multiunit activity  
13 recordings to noxH in L2/3, 4, and 5 of Dys and BF. The shaded areas indicate regions for  
14 calculating ratios of signal (S) to noise (N). **f**, Statistical comparison of S/N responses to noxH.  
15 \* $P < 0.05$ , \*\* $P < 0.01$ ,  $n = 8$  animals; Kruskal–Wallis test followed by Dunn’s test. **g**, Summary  
16 diagram indicates that S/N for noxH was higher in Dys than BF.

Osaki et al., (Figures)

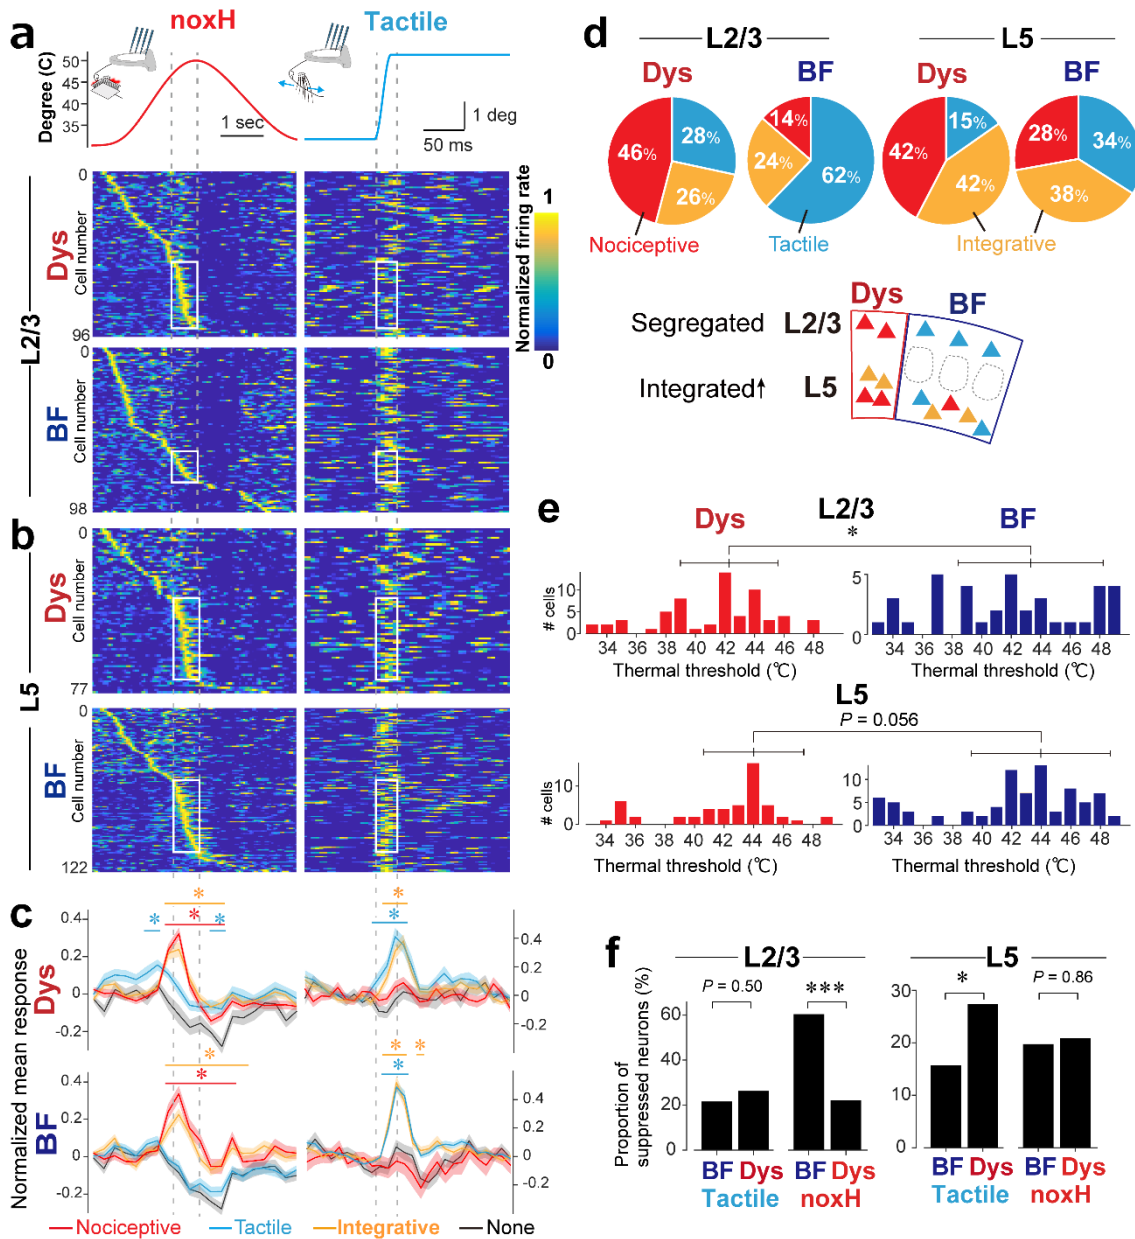

17

18

**Figure 2**

19

**Separate processing and interaction of nociception and tactile information in S1.**

20

Peristimulus time histograms for the responses of the same L2/3 (a) and L5 (b) neurons to noxious

21

heat (noxH) (left) and tactile (right) stimuli. 50 ms/bin for heat stimulus, 5 ms/bin for tactile

22

stimulus. Each row was sorted by peak response time for noxH, and firing rate was normalized

23

by peak response (boxed areas) in each row. c, Mean values from the histograms in panels a and

24

b sorted according to S/Ns to noxH and tactile stimuli: nociceptive, tactile, integrative

25

(nociceptive and tactile), and nonselective cells (none) (see Extended Data Fig. 4).  $*P < 0.05$

26

versus nonselective. d, Cell type distributions in L2/3 and L5 of each area and summary diagram.

27

e, Distributions of the thermal thresholds, determined from the temperature at which the neural

Osaki et al., (Figures)

28 responses reached 80% of peak spike rate. Dys neurons were tuned to noxious heat whereas BF  
29 neurons responded to various temperatures (L2/3 median  $\pm$  SD: BF, 43.9°C  $\pm$  4.6°C; Dys, 42.9°C  
30  $\pm$  3.4°C; \* $P$  = 0.013, two-sample Ansari–Bradley test for dispersions) (L5 median  $\pm$  SD: BF,  
31 43.9°C  $\pm$  4.7°C; Dys, 44.3°C  $\pm$  3.4°C). **f**, Proportions of neurons for which responses were  
32 suppressed ( $S/N < 1$ ) or facilitated ( $S/N \geq 1$ ). \* $P$  = 0.048, \*\*\* $P$  =  $5.4 \times 10^{-8}$ ,  $2 \times 2$   $\chi^2$  test between  
33 BF and Dys.



Osaki et al., (Figures)

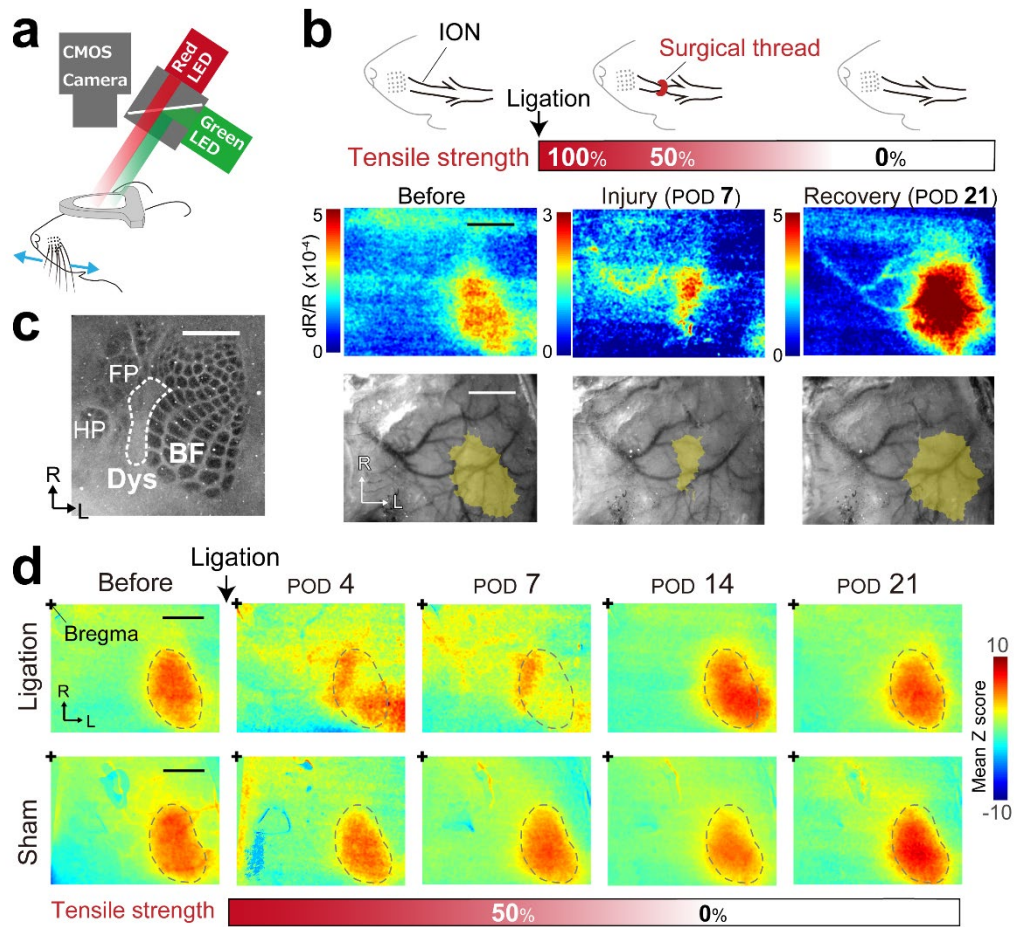

34

35 **Figure 3**

36 **Tactile activated region was shifted from the barrel field to the dysgranular region during**  
 37 **peripheral nerve injury.**

38 **a**, Schematic showing intrinsic signal imaging during whisker stimulation by the piezo device.

39 Red LED was used for intrinsic signal imaging, and green LED was used for obtaining the vessel

40 pattern of the brain surface. **b**, *Top*, Schematic of the time course for infraorbital nerve (ION)

41 ligation by an absorbable surgical thread. *Middle*, Typical examples of the intrinsic signal images

42 of an animal. *Bottom*, Overlaid images of the signal region (yellow) and vessel pattern used for

43 alignment. **c**, Cytochrome c oxidase staining of a tangential section of S1 L4. FP, forepaw; HP,

44 hindpaw. **d**, Averaged z-scored images (ligation group,  $n = 5$ ; sham group,  $n = 3$ ). The dotted areas

45 indicate BF activated by whisker stimulation before ligation. R, rostral; L, lateral; POD,

46 postoperative day. Scale bars, 1 mm.



Osaki et al., (Figures)

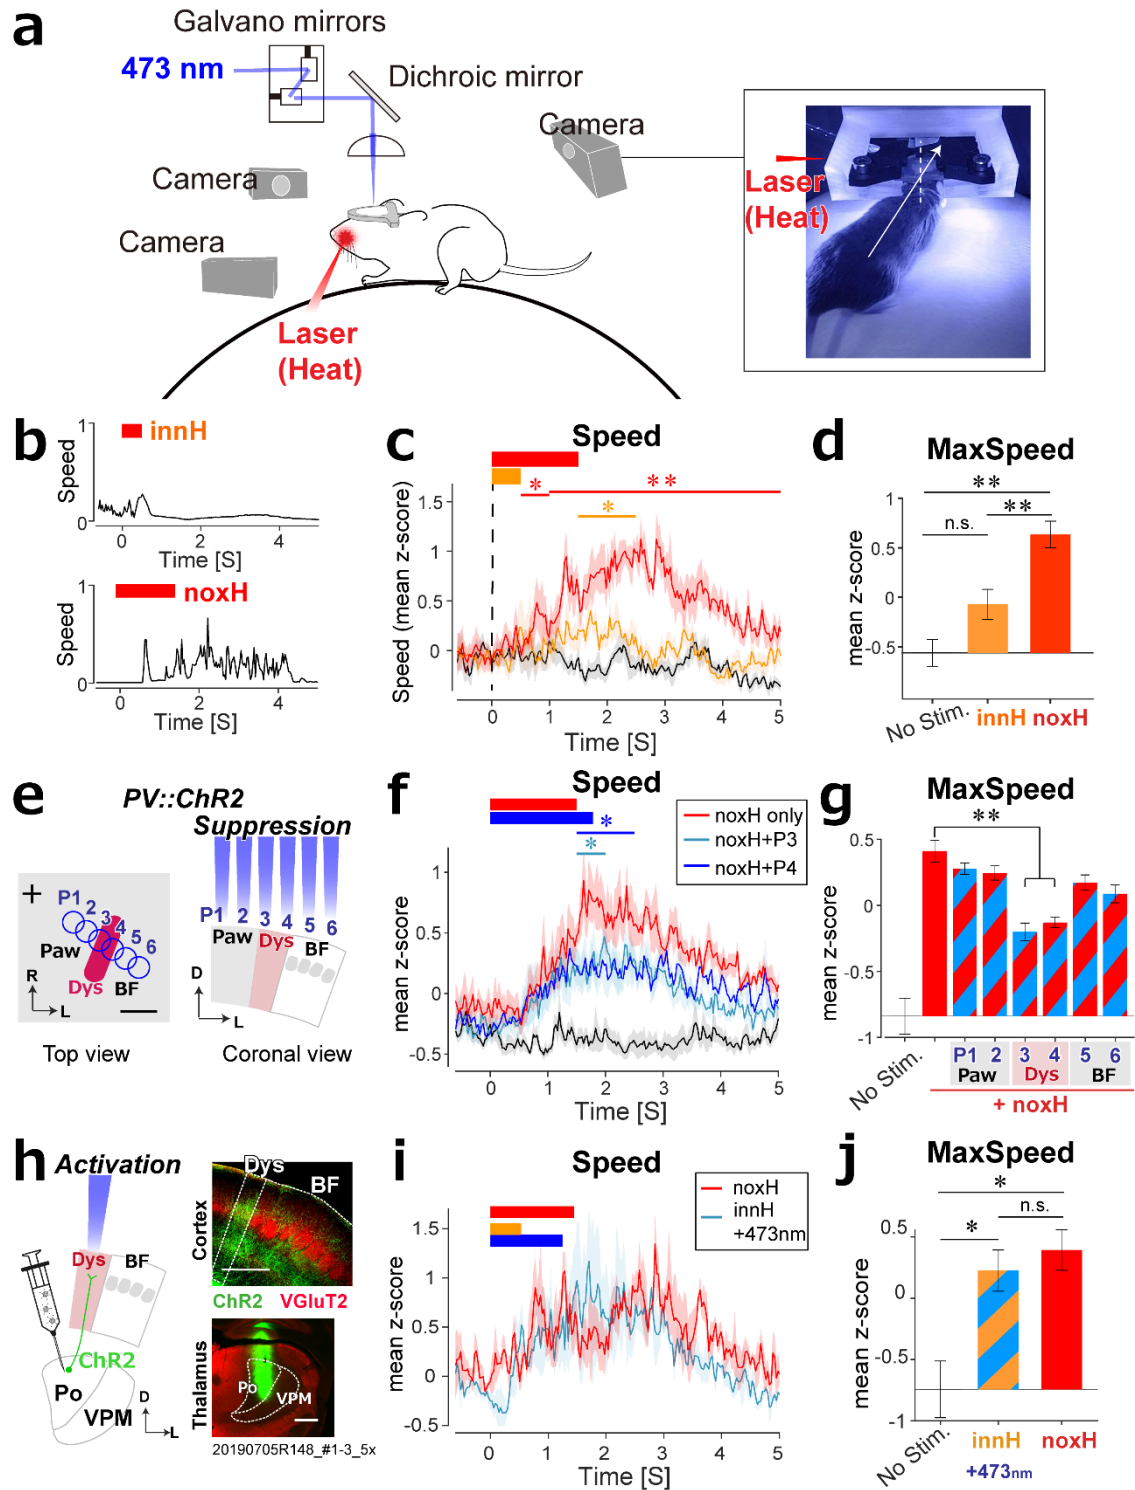

47

48 **Figure 4**

49 **Dysgranular region activity drives nocifensive escape behavior.**

50 **a**, Schematic for monitoring escape behaviors induced by applying an 808 nm infrared (IR)

51 laser to the whisker pad of a head-restrained freely moving animal on a spherical treadmill.

Osaki et al., (Figures)

52 Motion direction and the speed were monitored by a camera at the back, and facial expression  
53 and forelimb movement were monitored by side cameras. **b**, Examples of escape speed in  
54 response to 500 and 1,500 ms IR stimulation, corresponding to 0.09 (innocuous heat, innH) and  
55 0.27 J/mm<sup>2</sup> (noxH), respectively. **c**, Average speed profiles with (innH, orange; noxH, red) and  
56 without (black) IR stimulation ( $n = 6$  mice). **d**, Maximum speeds induced by IR stimulation. **e**,  
57 Scheme for silencing six S1 positions (430  $\mu\text{m}$  apart) via 473 nm photoactivation of  
58 channelrhodopsin-2 (ChR2) during noxH stimulation. Scale bar, 1 mm. +, bregma; R, rostral; L,  
59 lateral; D, dorsal. **f**, Average speed profiles show that optogenetic suppression at P3 (blue) and  
60 P4 (cyan) significantly reduced the escape speed to noxH ( $n = 6$  mice). **g**, Mean z-scores of the  
61 maximum speed. **h**, Scheme for activating the thalamocortical fibers from the posterior nucleus  
62 (Po) and an example of ChR2 expression in Po and in the thalamocortical fibers in Dys. Scale  
63 bars, 500  $\mu\text{m}$ . **i**, Average speed profile for optogenetic activation with innH matched that for  
64 noxH ( $n = 3$  mice). **j**, Mean z-scores of the maximum speed. n.s., not significant; \* $P < 0.05$ , \*\* $P$   
65  $< 0.01$ , \*\*\* $P < 0.001$ ; one-way ANOVA followed by Tukey–Kramer test. Shading and error  
66 bars indicate SEMs for mice.

Osaki et al., (Supplementary table)

**Supplementary Table 1. Capsaicin injection into the whisker pad increases the number of c-Fos-positive neurons in Dys L4.**

| Layer | Dys                                                                            |          |                      | BF                                                                             |          |                |
|-------|--------------------------------------------------------------------------------|----------|----------------------|--------------------------------------------------------------------------------|----------|----------------|
|       | Density of c-Fos <sup>+</sup> neurons (cells/10 <sup>4</sup> μm <sup>2</sup> ) |          | <i>P</i> value       | Density of c-Fos <sup>+</sup> neurons (cells/10 <sup>4</sup> μm <sup>2</sup> ) |          | <i>P</i> value |
|       | Capsaicin                                                                      | Vehicle  |                      | Capsaicin                                                                      | Vehicle  |                |
| L23   | 10.5±2.3                                                                       | 8.5±0.6  | 0.99                 | 13.1±1.8                                                                       | 13.0±0.4 | 1.0            |
| L4    | 26.4±2.5                                                                       | 11.8±2.0 | 1.2×10 <sup>-5</sup> | 27.3±5.0                                                                       | 23.1±3.6 | 0.97           |
| L5a   | 11.0±1.5                                                                       | 5.4±0.4  | 0.25                 | 10.9±2.3                                                                       | 10.8±1.9 | 1.0            |
| L5b   | 10.6±0.8                                                                       | 8.4±1.0  | 0.99                 | 11.3±2.4                                                                       | 13.5±1.7 | 1.0            |
| L6    | 13.9±0.8                                                                       | 7.3±1.7  | 0.10                 | 14.2±1.9                                                                       | 11.3±2.4 | 1.0            |

Values are means ± SEMs; *P* values are from Tukey–Kramer test (capsaicin, *n* = 3; vehicle, *n* = 4). The same data were used in the bar graphs in Fig. 1b.

Osaki et al., (Methods)

## 1 **Methods**

### 2 **Animals and surgery**

3 All surgical procedures and postoperative care were performed according to the  
4 guidelines of the Animal Care and Use Committee of Tokyo Women's Medical  
5 University. The animal experiment was approved under number AE19-109. C57BL/6N  
6 (Sankyo Lab. Service Corp., Tokyo, Japan), PV-Cre (JAX stock #008069), and Ai32  
7 (Rosa-CAG-LSL-ChR2[H134R]-EYFP-WPRE; JAX stock #012569) mouse lines were  
8 used in this study. PV-Cre mice were crossed with Ai32 mice, and the resulting mouse  
9 line was designated PV-ChR2. Male mice of 8 weeks or older in age were used. The  
10 animals were group-housed in a cage maintained at  $23^{\circ}\text{C} \pm 1^{\circ}\text{C}$  with a 12 h light/dark  
11 cycle, and all behavioral tests were performed during the dark period. Every effort was  
12 made to minimize the number of mice used and their suffering in this study. For surgical  
13 procedures, each animal was anesthetized with an intraperitoneal injection of ketamine  
14 (100 mg/kg body weight) and xylazine (16 mg/kg body weight), and isoflurane was  
15 supplemented to maintain the anesthesia. Lidocaine was applied subcutaneously at the  
16 incision site and to the wound margins for topical anesthesia. For intrinsic signal optical  
17 imaging, electrophysiological recordings, and behavioral testing on a spherical  
18 treadmill, a custom-built headplate was attached to the skull with dental acrylic clear

Osaki et al., (Methods)

19 resin (Super-Bond; Sun Medical, Shiga, Japan). The head plate-implanted animals were  
20 returned to the home cage and allowed to recover from the surgery for at least 4 days.

21

## 22 **Capsaicin injection**

23 For capsaicin injections into the whisker pad, mice were anaesthetized with 2%  
24 isoflurane. Capsaicin (Wako Pure Chemical Industries, Ltd., Osaka, Japan) was  
25 dissolved in 100% ethanol (229  $\mu$ l), and then mixed with 7% Tween 80 in saline (3.04  
26 ml). Capsaicin (10 mM, 50  $\mu$ l) was injected into the left whisker pad. A solution  
27 containing 100% ethanol, 7% Tween 80, and saline was used as the vehicle<sup>1</sup>. One hour  
28 after the injection, the animals were perfused with 4% paraformaldehyde with picric  
29 acid followed by c-Fos immunohistochemistry using the diaminobenzidine (DAB)  
30 protocol described below.

31

## 32 **c-Fos immunohistochemistry using DAB**

33 After the brains were postfixed, 50- $\mu$ m-thick slices were made, and alternate slices were  
34 reacted with cytochrome c oxidase to identify BF, and with c-Fos  
35 immunohistochemistry. For c-Fos immunohistochemistry, the slices were processed  
36 with 1% H<sub>2</sub>O<sub>2</sub> in phosphate buffer to deactivate the intrinsic peroxidase and then

Osaki et al., (Methods)

37 incubated with an anti-c-Fos antibody (1:10,000, rabbit; Merck KGaA, Darmstadt,  
38 Germany) in 10% normal goat serum in phosphate-buffered saline with 0.3% Triton X-  
39 100 (PBS-X) at 4°C overnight. The slices were then incubated with a biotinylated goat  
40 anti-rabbit IgG antibody (1:200; Vector Laboratories, Burlingame, CA, USA) and  
41 reacted with avidin-biotin-peroxidase complex (ABC kit; Vector Laboratories). The  
42 slices were incubated in a DAB solution (0.02% DAB, 0.3% nickel ammonium sulfate  
43 in Tris-buffered saline) and 1% H<sub>2</sub>O<sub>2</sub> for visualization. Images were acquired with an  
44 upright microscope with a charge-coupled-device camera (DP70; Olympus, Tokyo,  
45 Japan). The neurons expressing c-Fos were counted by a custom-written MATLAB  
46 (MathWorks, Natick, MA, USA) program with edge detection by a Sobel filter followed  
47 by binarisation. The numbers of c-Fos-positive neurons in two different slices were  
48 averaged to minimize selection bias.

49

## 50 **Electrophysiological recording**

51 For electrophysiological recordings from Dys and BF regions, each mouse was  
52 anaesthetized with isoflurane (0.4–0.8%) supplemented with an intraperitoneal injection  
53 of chlorprothixene hydrochloride (2 mg/kg body weight)<sup>2</sup>. As the nociceptive response  
54 depends on the level of anaesthesia<sup>3</sup>, the respiration rate (70–120 cycles/s) was

Osaki et al., (Methods)

55 monitored to control the level of anesthesia.

56 After identifying the border between Dys and BF regions according to intrinsic

57 signal imaging, 32-channel four-shank electrodes (A4x8 or Buzsaki32; NeuroNexus,

58 Ann Arbor, MI, USA) were inserted into S1 to record from Dys and BF regions

59 simultaneously. Raw electrical signals were amplified and digitized at 40 kHz (Plexon,

60 Dallas, TX, USA) and then processed for spike sorting. The spike sorting comprised

61 automated spike detection and clustering using Klusta followed by manual sorting using

62 Kwik GUI<sup>4</sup>. First, noise artifacts determined from the waveform were extracted.

63 Second, multiunit activity (MUA) was determined from the waveform with low

64 amplitude and without a refractory period ( $>2$  ms) in autocorrelograms. Third, after

65 merging and/or splitting clusters using auto- and cross-correlograms and principal-

66 component features, single-unit activity (SUA), which has a clear refractory period ( $>2$

67 ms) in autocorrelograms, or MUA was determined. To estimate the depth of recorded

68 neurons, the maximum amplitudes of waveforms from each probe were compared and

69 determined for the nearest probe for each SUA/MUA. For MUA analysis, SUA is

70 included in MUA ( $n = 8$  animals, 128 probe sites for simultaneously recorded MUA

71 analysis).

72

Osaki et al., (Methods)

### 73 **Calculation of the S/N for noxious and tactile stimuli**

74 We calculated the S/N to identify the area or cell properties and assessed selectivity to  
75 noxious heat and tactile stimuli. For the S/Ns for the noxious heat response, the  
76 response for 500 ms over 45°C of the Peltier device (45–50°C, beige shading, Fig. 1e)  
77 was counted as the S response. The innocuous heat response (for 1,000 ms until 45°C  
78 corresponding to 33–45°C, grey shading, Fig. 1e) was counted as the N response. This  
79 definition helped to select noxious heat-selective neurons by excluding the temperature-  
80 coding neurons.

81 For tactile stimulus, the response for 30 ms after the onset of the whisker  
82 deflection (blue arrows, Fig. 2a, right; Extended Data Fig. 3) was counted as the S  
83 response. The response for 60 ms until the onset of the whisker deflection was counted  
84 as the N response (Extended Data Fig. 3). All deflections were used for this calculation  
85 (Extended Data Fig. 3). This definition helped to detect how the neuron responds to  
86 sequential whisker deflection<sup>5</sup>.

87

### 88 **Formalin injection and c-Fos immunofluorescence**

89 Each mouse received an intraplantar injection into the left hind paw of 50 µl of a 5.0%  
90 formalin solution using a 27-gauge needle. One hour later, the animals were perfused



Osaki et al., (Methods)

91 with 4% paraformaldehyde with picric acid. The brains were removed, and the right  
92 hemispheres were flattened between two glass slides. After the brains were postfixed,  
93 tangential 50- $\mu$ m-thick sections were made, followed by c-Fos and vesicular glutamate  
94 transporter type 2 (vGluT2) immunostaining and Nissl staining. Briefly, the sections  
95 were incubated with anti-c-Fos antibody (1:5,000, rabbit; Merck KGaA) and anti-  
96 vGluT2 antibody (1:500, vGluT2-GP-Af810; Frontier Science, Ishikari, Japan) in 10%  
97 normal donkey serum in PBS-X at 4°C overnight. The sections were then incubated  
98 with the following secondary antibodies: anti-rabbit antibody (Alexa Fluor 568  
99 conjugated, 1:1,000, donkey; Invitrogen) and anti-guinea pig antibody (Alexa Fluor 647  
100 conjugated, 1:200, donkey; Jackson ImmunoResearch, West Grove, PA, USA). Images  
101 were acquired with an epifluorescence microscope (Axio Scope.A1; Carl Zeiss) with a  
102 cooled charge-coupled-device camera (RS 6.1; Quantum Scientific Imaging) and by  
103 using  $\mu$ Manager (<http://www.micro-manager.org>) and ImageJ software  
104 (<https://imagej.nih.gov/ij>). The neurons expressing c-Fos were counted by a custom-  
105 written MATLAB program with edge detection by a Sobel filter, followed by  
106 binarisation.

107

108 **Anterograde/retrograde labelling**

Osaki et al., (Methods)

109 For retrograde labeling, cholera toxin subunit B conjugated with Alexa Fluor 555  
110 (0.2%) or with Alexa Fluor 488 (1%) were applied after intrinsic signal imaging to  
111 identify the Dys or BF region, respectively. Three days later, the mouse was deeply  
112 anaesthetized with sodium pentobarbital (60 mg/kg body weight, intraperitoneally) and  
113 transcardially perfused with a fixative solution (4% paraformaldehyde and 0.2% picric  
114 acid in 0.1 M phosphate buffer). The brains were removed and cut coronally into 50 µm  
115 sections. Sections were incubated overnight with a guinea pig polyclonal antibody  
116 against vGluT2 (1:500; vGluT2-GP-Af810) followed by NeuroTrace 435/455 (1:100;  
117 Thermo Fisher Scientific, Waltham, MA, USA).

118 For anterograde labeling, biotinylated dextran amine (molecular weight:  
119 10,000, 10% in saline; Thermo Fisher Scientific) was injected into the Po (1.7 mm  
120 posterior to bregma and 1.3 mm lateral to the midline). Seven days later, the mouse was  
121 deeply anesthetized and brain sections were cut, as described above. Sections were  
122 incubated overnight with vGluT2-GP-Af810 antibody followed by Alexa Fluor 594-  
123 conjugated secondary antibody (1:500; Jackson ImmunoResearch), Alexa Fluor 488-  
124 conjugated streptavidin (Thermo Fisher Scientific), and subsequently with NeuroTrace  
125 435/455 (1:100; Thermo Fisher Scientific).

126

Osaki et al., (Methods)

127 **Intrinsic signal optical imaging**

128 At least 4 days after the head plate implantation, intrinsic signal imaging was performed  
129 to measure the responses from BF. The mouse was anesthetized as described above in  
130 “Electrophysiological recording”. The respiration rate and heart rate were monitored via  
131 a video-based respiration monitor with a 30 Hz web camera (C920; Logitech, Lausanne,  
132 Switzerland) and an acceleration monitor on the back of the animal. Intrinsic signal  
133 images were obtained with a CMOS camera (MV1-D1024E-160-CL; Photonfocus,  
134 Lachen, Switzerland) with the tandem lens of an achromatic doublet (Thorlabs, Newton,  
135 NJ, USA) and long-pass and short-pass filters (BLP01-488R-25 and FF01-650/SP-25;  
136 Semrock, Rochester, NY, USA). Frames were acquired at a rate of 20 Hz, and the frame  
137 size was  $600 \times 500$  pixels and represented  $5.5 \times 4.5$  mm of cortical area. The brain  
138 surface was illuminated by a green LED (M530L3; Thorlabs) to obtain the vessel  
139 pattern or a red LED (M617L3; Thorlabs) to obtain the intrinsic signal. Images were  
140 recorded through the skull covered with dental acrylic clear resin. The dental acrylic  
141 resin was covered with a nail topcoat and silicone immersion oil (Olympus) to reduce  
142 glare.

143 Whisker stimulations as tactile stimuli were generated using a piezoelectric  
144 device as described previously<sup>5</sup>. To visualize the cortical response to tactile stimuli, we

Osaki et al., (Methods)

145 calculated the reflectance ratio in each frame ( $dR/R$ , where  $dR$  is the difference of  
146 reflectance  $R$  from the base image that is the average from 20 frames taken before  
147 stimulus onset). To map the change in cortical activity, images taken on different  
148 experimental days were aligned according to vessel patterns using a custom-written  
149 MATLAB program. For population analysis, we calculated the z-scored image from  
150  $dR/R$  using the following equation:

$$151 \quad z - \text{score}(\text{pixel}) = \frac{\frac{dR}{R}(\text{pixel}) - \text{mean}\left(\frac{dR}{R}(\text{all pixels})\right)}{SD(\text{all pixels})},$$

152 where  $SD$  is the standard deviation. The positions of bregma were used for alignment  
153 between the animals.

154

### 155 **ION ligation and behavioral assay using von Frey filaments**

156 To produce a neuropathic pain model, the ION was tightly ligated by a surgical thread  
157 (Vicryl Rapide; Ethicon, Bridgewater, NJ, USA). This thread enables us to observe  
158 changes in BF activity during both nerve injury and recovery, as the tensile strength of  
159 the thread gradually reduces inside the body (within 2–3 weeks); the tensile strength is  
160 reduced to almost 50% at POD 7 and 0% at POD 21, corresponding to the phases of  
161 nerve injury and recovery, respectively. For the behavioral assay of neuropathic pain,  
162 the animals were trained to enter a 50 ml tube with a custom-made tube holder.

Osaki et al., (Methods)

163 Behavioral training began after the mice had restricted access to water (1 ml/day) before  
164 at least 7 days of left ION ligation or sham operation. The water was restricted to 1.5 ml  
165 for 1 day during the behavioral experiment. The animals were trained to enter the tube  
166 and keep their snouts protruded through a hole to drink water. While the animals were  
167 drinking, the left whisker pad was stimulated by von Frey filaments (1.4, 2, 4, 6, 8, and  
168 10 g; Ugo Basile, Varese, Italy) to measure the escape threshold<sup>6</sup>. During stimulation by  
169 the filament, visual information was blocked by a black cover (Extended Data Fig. 6).

170

#### 171 **Environmental enrichment**

172 At 7 or 21 days after ION ligation and 7 days after sham operation, the mice were  
173 placed into an enriched environment for 1 h to enhance whisking while exploring  
174 several objects (Extended Data Fig. 6). Then, the mice were perfused with 4%  
175 paraformaldehyde with picric acid followed by c-Fos immunohistochemistry using the  
176 DAB protocol described above.

177

#### 178 **Measurement and analysis for pain behavior on a spherical treadmill**

179 Mice were first trained to enter a tube to obtain a water reward for 3–4 days. Mice were  
180 then head-fixed and free to run on a spherical treadmill (Ø 30 cm) under a white noise

Osaki et al., (Methods)

181 sound condition<sup>7</sup> for 3–4 days. After this, the behaviors of the mice towards the IR laser  
182 stimulus on the left whisker pad were monitored. For the noxious heat stimulus, an IR  
183 diode laser ( $\varnothing$  1 mm on the whisker pad, wavelength of 808 nm, SSL-808-1000-10TM-  
184 D-LED; Shanghai Sanctity Laser Technology Co., Ltd., Shanghai, China) was used. The  
185 stimulus duration was set to 500 or 1,500 ms, corresponding to 0.09 or 0.27 J/mm<sup>2</sup>,  
186 respectively, to increase the skin temperature to 39°C or 52°C<sup>8</sup>. At the start and end of  
187 each session, the animals obtained a water reward on the treadmill but not during the  
188 stimulus sessions. Each session was composed of various stimulus conditions: each  
189 condition was randomly chosen and presented to the animal five times in one session.  
190 The animals were imaged with three cameras at 30 Hz (the IR filter on the CMOS  
191 sensor was removed, C922; Logitech, Lausanne, Switzerland) set behind and to each  
192 side of the animal to record behaviors such as escape direction, speed, moving distance,  
193 eyeblink, and left forelimb movement. These parameters were analyzed by calculating  
194 the difference of the region of interest of each parameter frame by frame. These  
195 parameters were calculated into z-scores for comparisons among the animals by a  
196 custom-written MATLAB code. If the animal ran continuously on the treadmill and did  
197 not show any difference in the maximum speed between trials, the session was excluded  
198 from the analysis. At least 2 sessions were used for calculation of z-scores. A notch filter

Osaki et al., (Methods)

199 (808 nm OD4 notch filter, 86-702; Edmund Optics) was placed in front of the left side  
200 camera to prevent sensor white-out and to identify the precise position and size of the  
201 IR laser stimulation. Custom-made LED illuminators (940 nm) were placed in front of  
202 each camera to illuminate the animals.

203

#### 204 **Optogenetic activation and suppression of Dys**

205 To activate the thalamocortical fibers from Po into Dys, a virus (AAV9-hSyn-  
206 hChR2(H134R)-EYFP) was injected into the right Po (1.7–1.9 mm caudal and 1.2 mm  
207 lateral to bregma; depth, 2,800 and 3,000  $\mu\text{m}$  from the brain surface; 50 nl at each  
208 depth) (QSI; Stoelting, Wood Dale, IL, USA). A blue laser (473 nm; Lasos, Germany)  
209 was coupled to an optic fiber cable ( $\text{\O}$  200  $\mu\text{m}$ ; Thorlabs). The output of the optic fiber  
210 and the surface of the cortex were placed on conjugate planes using a fiber port and an  
211 achromatic lens. The  $x$  and  $y$  Galvano mirrors (Galvano scanning system, GVS002;  
212 Thorlabs) were placed in the infinity space to control the position of the stimulus. A  
213 dichroic mirror was also placed in the infinity space, and the reflected light was focused  
214 onto the sensor of a CMOS camera (Grasshopper3; FLIR). This design enabled  
215 monitoring of the precise location of the stimulated site<sup>9</sup>.

216 An optical chopper (pulse width, 2.5 ms, MC2000B; Thorlabs) was used to

Osaki et al., (Methods)

217 activate PV interneurons with a 40 Hz pulse<sup>10</sup>. To investigate the suppressive effect of  
218 Dys activity, the six positions covering Dys were stimulated by a blue laser focused on  
219 the brain surface by an achromatic doublet lens (AC254-60-A; Thorlabs). The centers of  
220 the stimulation sites were 430  $\mu\text{m}$  apart, the spot diameter was 1.5 mm, and the power  
221 was  $\sim 0.9$  mW per location.

222

### 223 **Code and data availability**

224 All codes used for analysis in this study were implemented in MATLAB. The codes and  
225 the data are available from the corresponding author upon reasonable request.

226

227

228

229

230

231

232

233

234



235

236 **References**

237

- 238 1 Noma, N. *et al.* Organization of pERK - immunoreactive cells in trigeminal spinal nucleus  
239 caudalis and upper cervical cord following capsaicin injection into oral and craniofacial regions  
240 in rats. *Journal of Comparative Neurology* **507**, 1428-1440, doi:10.1002/cne.21620 (2008).
- 241 2 Niell, C. M. & Stryker, M. P. Highly selective receptive fields in mouse visual cortex. *The*  
242 *Journal of neuroscience : the official journal of the Society for Neuroscience* **28**, 7520-7536,  
243 doi:10.1523/JNEUROSCI.0623-08.2008 (2008).
- 244 3 Borges, M. & Antognini, J. F. Does the Brain Influence Somatic Responses to Noxious Stimuli  
245 during Isoflurane Anesthesia? *Anesthesiology* **81**, 1511-1515, doi:10.1097/00000542-  
246 199412000-00027 (1994).
- 247 4 Rossant, C. *et al.* Spike sorting for large, dense electrode arrays. *Nature neuroscience* **19**, 634-  
248 641, doi:10.1038/nn.4268 (2016).
- 249 5 Fukui, A. *et al.* Layer-specific sensory processing impairment in the primary somatosensory  
250 cortex after motor cortex infarction. *Scientific reports* **10**, 3771, doi:10.1038/s41598-020-60662-  
251 7 (2020).
- 252 6 Kitagawa, J. *et al.* Mechanisms involved in modulation of trigeminal primary afferent activity in  
253 rats with peripheral mononeuropathy. *European Journal of Neuroscience* **24**, 1976-1986,  
254 doi:10.1111/j.1460-9568.2006.05065.x (2006).
- 255 7 Hu, L. *et al.* Was it a pain or a sound? Across-species variability in sensory sensitivity.  
256 *PAIN* **156**, 2449-2457, doi:10.1097/j.pain.0000000000000316 (2015).
- 257 8 Plaghki, L. & Mouraux, A. How do we selectively activate skin nociceptors with a high power  
258 infrared laser? Physiology and biophysics of laser stimulation. *Neurophysiologie*  
259 *Clinique/Clinical Neurophysiology* **33**, 269-277, doi:10.1016/j.neucli.2003.10.003 (2003).
- 260 9 Sato, T. R. *et al.* Interhemispherically dynamic representation of an eye movement-related  
261 activity in mouse frontal cortex. *eLife* **8**, doi:10.7554/elife.50855 (2019).
- 262 10 Cardin, J. A. *et al.* Driving fast-spiking cells induces gamma rhythm and controls sensory  
263 responses. *Nature* **459**, 663, doi:10.1038/nature08002 (2009).

264

Osaki et al., (Extended Data Figures)

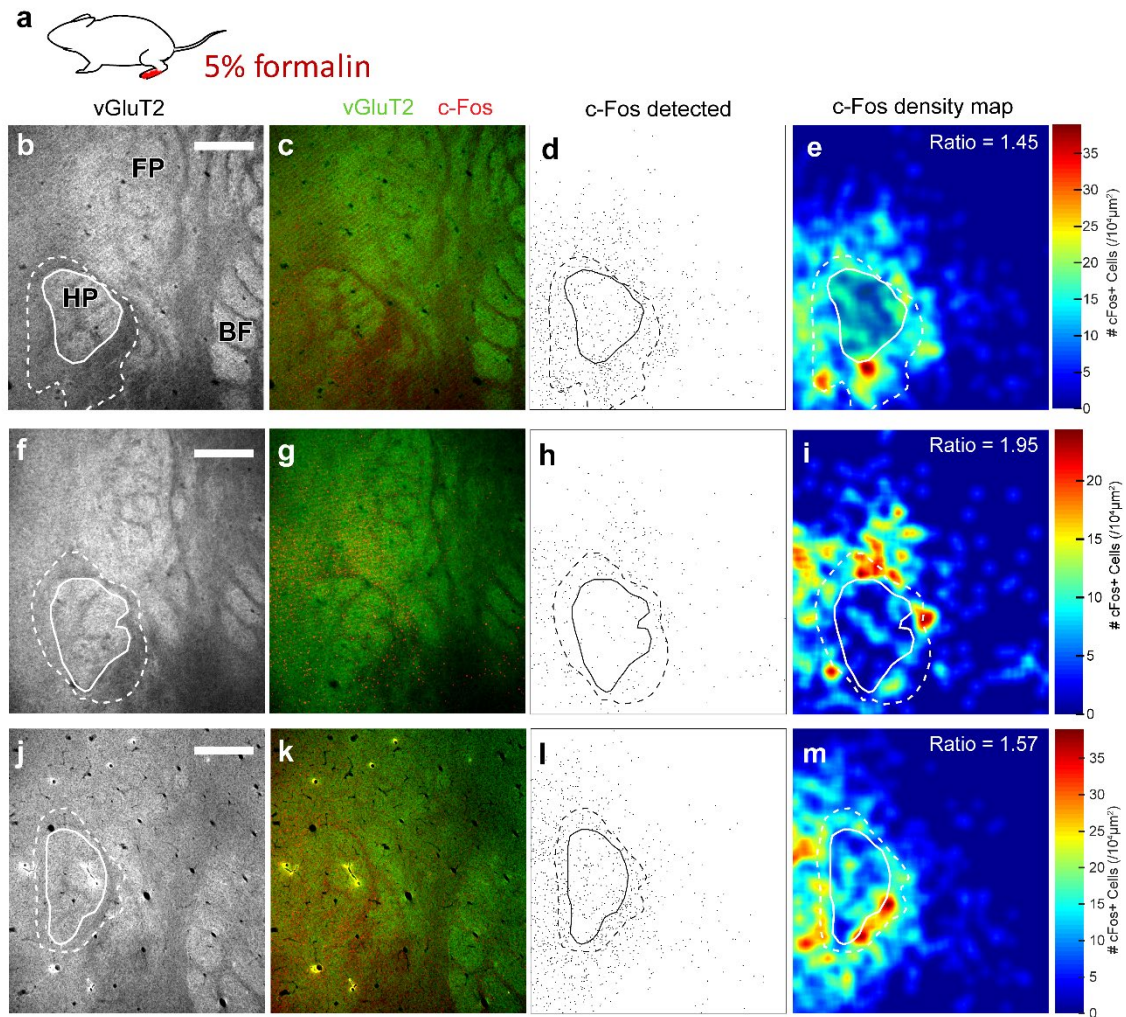

1

2 **Extended Data Fig. 1.**

3 **Noxious input into hind paw activates Dys L4 of the hindpaw area.**

4 **a**, Formalin (5%) was injected into the left hind paw. **b,f,j**, Tangential sections of S1 L4 from  
5 different mice. The granular areas of hindpaw (HP, white trace) and Dys (white dotted trace) were  
6 determined by immunostaining of the vesicular glutamate transporter-2 (vGluT2). FP, forepaw;  
7 BF, whisker barrel field. Scale bars, 400  $\mu\text{m}$ . **c,g,k**, Co-immunostaining of vGluT2 (green) and c-  
8 Fos (red) after formalin injection into HP. **d,h,l**, Maps of c-Fos-positive neurons. **e,i,m**, Colour  
9 maps of c-Fos density overlaid with granular and dysgranular regions for the hind paws. Ratio  
10 of c-Fos-positive neurons (Dys/HP) of each mouse is shown.

Osaki et al., (Extended Data Figures)

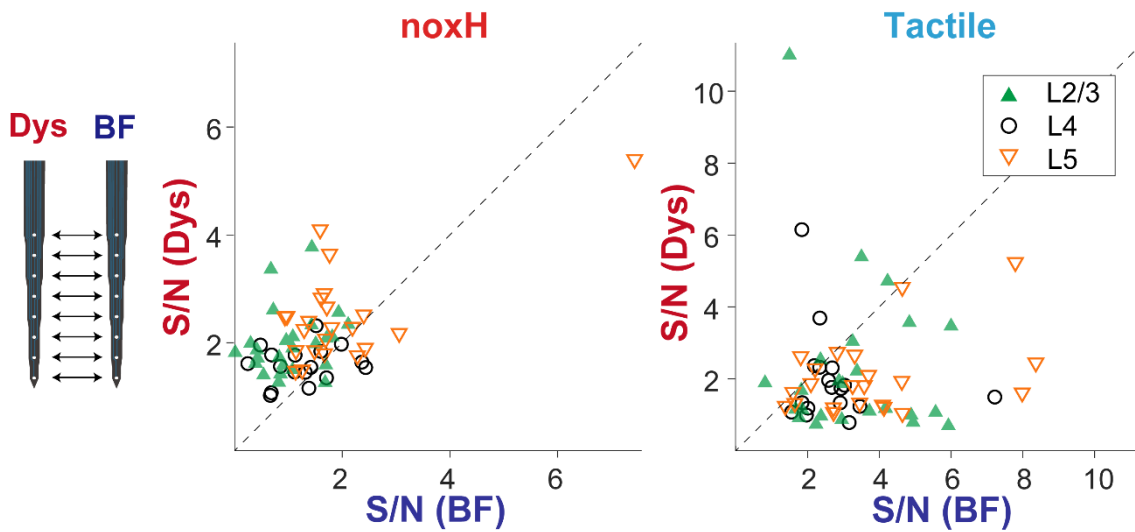

11

12 **Extended Data Fig. 2.**

13 **Simultaneously recorded multiunit activities show the difference of response properties**  
14 **between Dys and BF to noxH and tactile stimuli.**

15 The diagonal indicates unity. *Left*, Scatter plot of S/N to noxious heat (noxH) stimulus.  $P =$   
16  $0.000023$  for L2/3 ( $n = 25$ ),  $0.0056$  for L4 ( $n = 17$ ), and  $0.062$  for L5 ( $n = 22$ ) by Wilcoxon signed-  
17 rank test. *Right*, Scatter plot of S/N to tactile stimulus.  $P = 0.00382$  for L2/3 ( $n = 25$ ),  $0.028$  for  
18 L4 ( $n = 17$ ), and  $0.00020$  for L5 ( $n = 22$ ) by Wilcoxon signed-rank test.

Osaki et al., (Extended Data Figures)

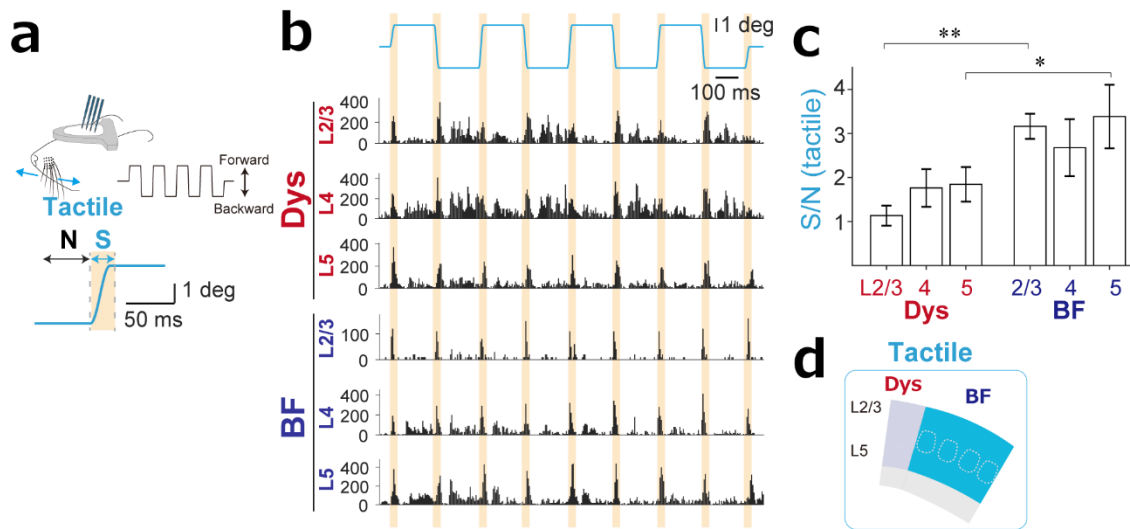

19

20 **Extended Data Fig. 3.**

21 **BF responds more selectively to tactile input than Dys.**

22 **a**, *Top*, Setup for recording responses to tactile stimulation of whiskers. The four-shank electrodes  
23 were inserted into Dys and BF. *Bottom*, Shaded area indicates the time used as signal (S) and  
24 noise (N) in S/N calculation of tactile input. **b**, Examples of perstimulus time histograms of  
25 multiunit activity to tactile stimulus in L2/3, 4, and 5 of Dys and BF recorded at the same time  
26 (see also Fig. 1e). The S/Ns to tactile stimuli were 1.1 (L2/3), 1.8 (L4), and 1.8 (L5) in Dys and 3.2  
27 (L2/3), 2.7 (L4), and 3.4 (L5) in BF. **c**, S/Ns to a tactile stimulus were higher in BF in L2/3 ( $P = 5.4$   
28  $\times 10^{-4}$ ) and L5 ( $P = 0.031$ ) (compare with Fig. 1e).  $*P < 0.05$ ;  $**P < 0.01$  by Kruskal–Wallis test  
29 followed by Dunn's test;  $n = 8$  animals. **d**, Summary diagram indicates that S/N for tactile stimuli  
30 was higher in BF than Dys.

Osaki et al., (Extended Data Figures)

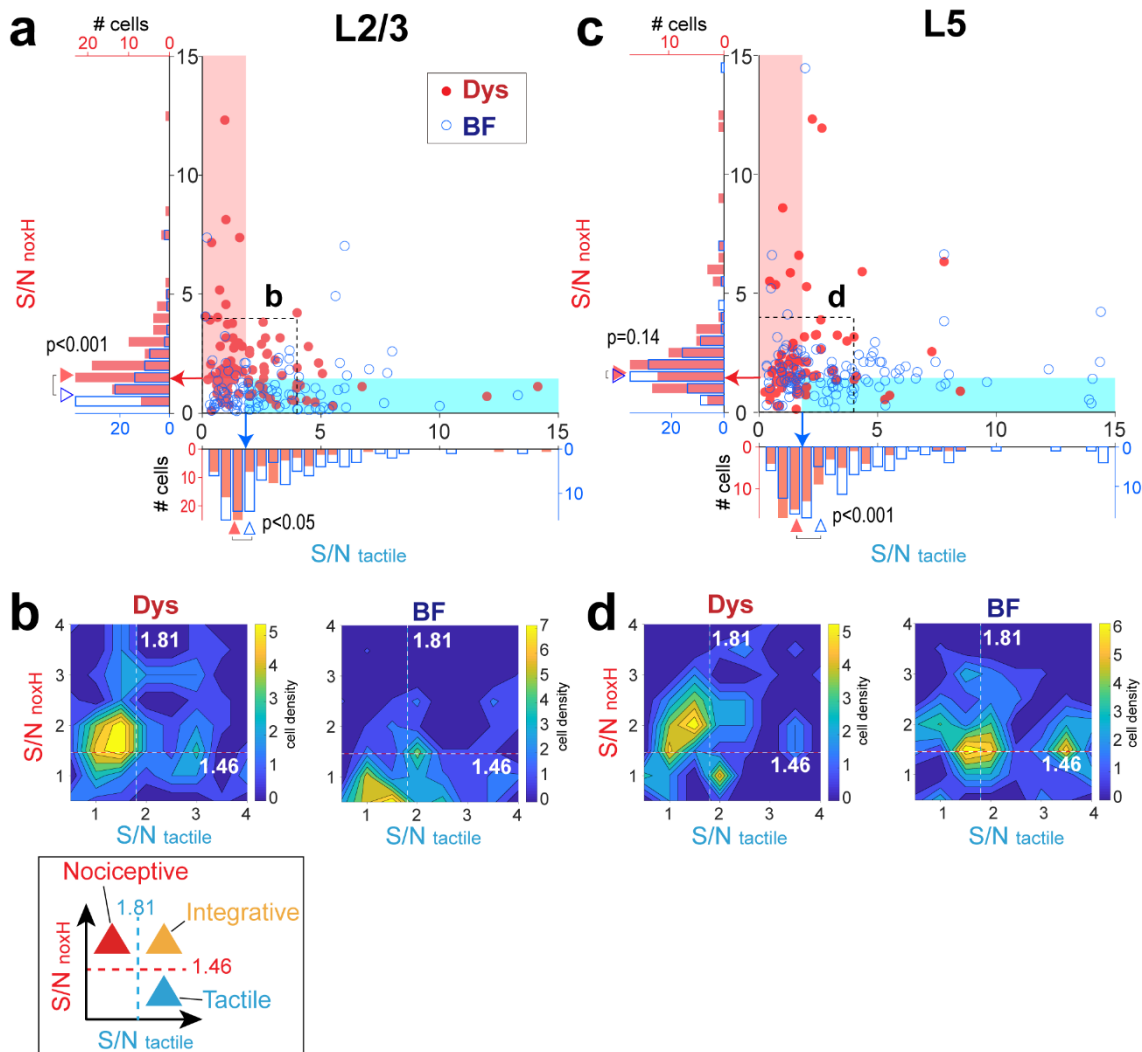

31

32

**Extended Data Fig. 4**

33

**Segregation and integration of noxious heat and tactile information were observed in the scatter plots of S/Ns of all neurons.**

34

35

**a**, Scatter plot of S/Ns to a tactile stimulus against S/Ns to noxious heat stimulus (noxH) for

36

L2/3 neurons. The neurons in the blue shaded area are the tactile input-preferring neurons, for

37

which S/Ns to a tactile stimulus were higher than 1.81 (the median of all neurons, blue arrow),

38

and the S/Ns to noxH were lower than 1.46 (the median of all neurons, red arrow). The neurons

39

in the red shaded area are the noxious input-preferring neurons, for which S/Ns to a tactile

40

stimulus were lower than 1.81, and the S/Ns to noxH were higher than 1.46. The distribution of

41

S/Ns for noxH of Dys is significantly higher than that of BF ( $P = 4.82 \times 10^{-9}$ , two-sample

42

Kolmogorov–Smirnov test). Red arrowhead on the y axis indicates the median S/N for noxH of

43

Dys neurons, 1.60; blue arrowhead indicates median of BF neurons, 0.77. The distribution of

44

S/Ns for tactile stimulus in Dys is significantly lower than that in BF ( $P = 0.012$ , two-sample

45

Kolmogorov–Smirnov test). Red arrowhead on the x axis indicates the median S/N for tactile

Osaki et al., (Extended Data Figures)

46 stimulation of Dys neurons, 1.36; blue arrowhead indicates median of BF neurons, 2.00. **b**,  
47 Density map of S/Ns to tactile stimulus against S/Ns to noxH of L2/3 neurons, with each S/N  
48 <4. **c**, Same as for panel b but for L5 neurons. The distributions are not significantly different  
49 from each other for S/Ns for noxH ( $P = 0.14$ , two-sample Kolmogorov–Smirnov test). Red  
50 arrowhead on the  $y$  axis indicates the median S/N for noxH of Dys neurons, 1.65; blue  
51 arrowhead indicates the median of BF neurons, 1.52. The distributions of S/Ns for tactile  
52 stimulation are different from each other ( $P = 0.00056$ , two-sample Kolmogorov–Smirnov test).  
53 The red arrowhead on the  $x$  axis indicates the median S/N for tactile stimulation of Dys neurons,  
54 1.58; blue arrowhead indicates median of BF neurons, 2.57. **d**, Same as for panel c but for L5  
55 neurons. *Bottom*, Cell classification (see also Fig. 2c).

Osaki et al., (Extended Data Figures)

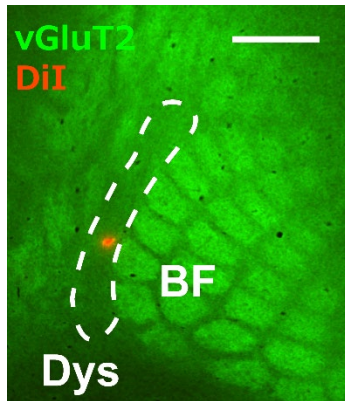

56

57 **Extended Data Fig. 5.**

58 **Region adjacent to BF was identified as Dys.**

59 An electrode stained with DiI (red) was inserted into the region adjacent to BF after intrinsic  
60 signal imaging was performed. Immunohistochemistry was performed on a tangential section of  
61 L4 to identify BF via vGluT2 (green). Scale bar, 500  $\mu$ m.



Osaki et al., (Extended Data Figures)

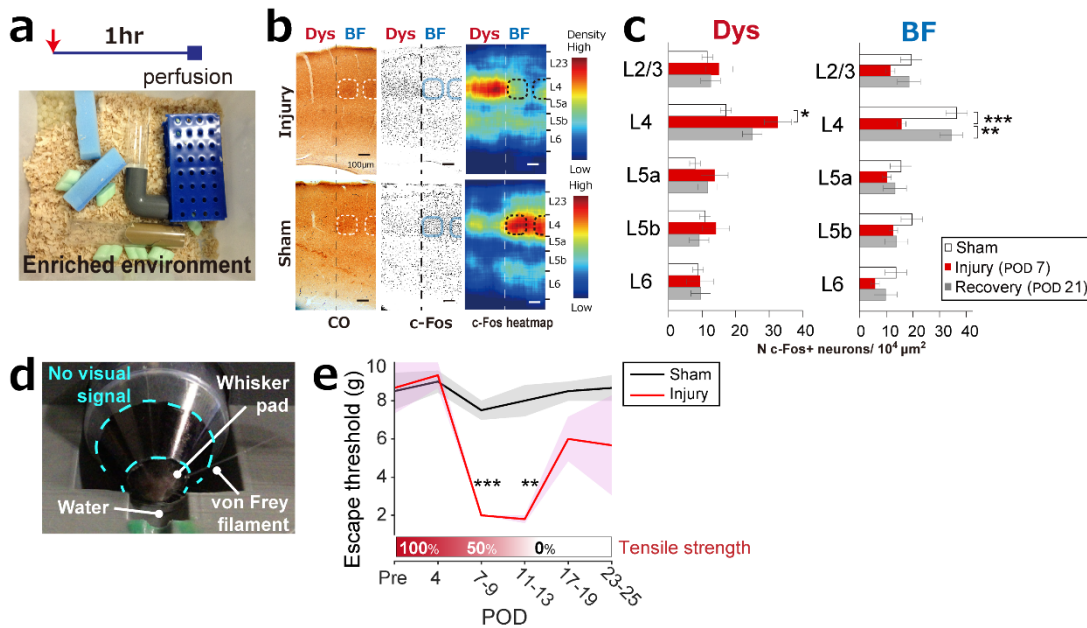

62

63

**Extended Data Fig. 6.**

64

**Infraorbital nerve ligation by absorbable surgical thread induced allodynia and activated Dys.**

65

**a-c**, Dysgranular area was activated under enriched environmental conditions during infraorbital nerve

66

ligation. **a**, Animals were placed in the enriched environment for 1 h before perfusion. **b**, Examples

67

of CO staining, c-Fos expression, and c-Fos density heat map 7 days after ligation/sham operation

68

(POD7). **c**, L4 of Dys was activated at day 7. c-Fos expression in L4 of BF decreased at day 7

69

and recovered to sham level at day 21. \* $P = 0.0485$ , \*\* $P = 0.00318$ , \*\*\* $P = 0.000242$  by one-

70

way ANOVA followed by Tukey–Kramer test; sham,  $n = 4$ ; injury,  $n = 3$ ; recovery,  $n = 3$ . **d**, Setup

71

for von Frey test. **e**, Mechanical allodynia was observed at 7–9 (\*\*\*) and 11–13 (\*\* $P$

72

$= 0.0015$ ) days after nerve ligation (one-way ANOVAs followed by Dunnett’s test). Error bars

73

and shading indicate SEMs. Sham,  $n = 3$ ; injury,  $n = 3$ .



Osaki et al., (Extended Data Figures)

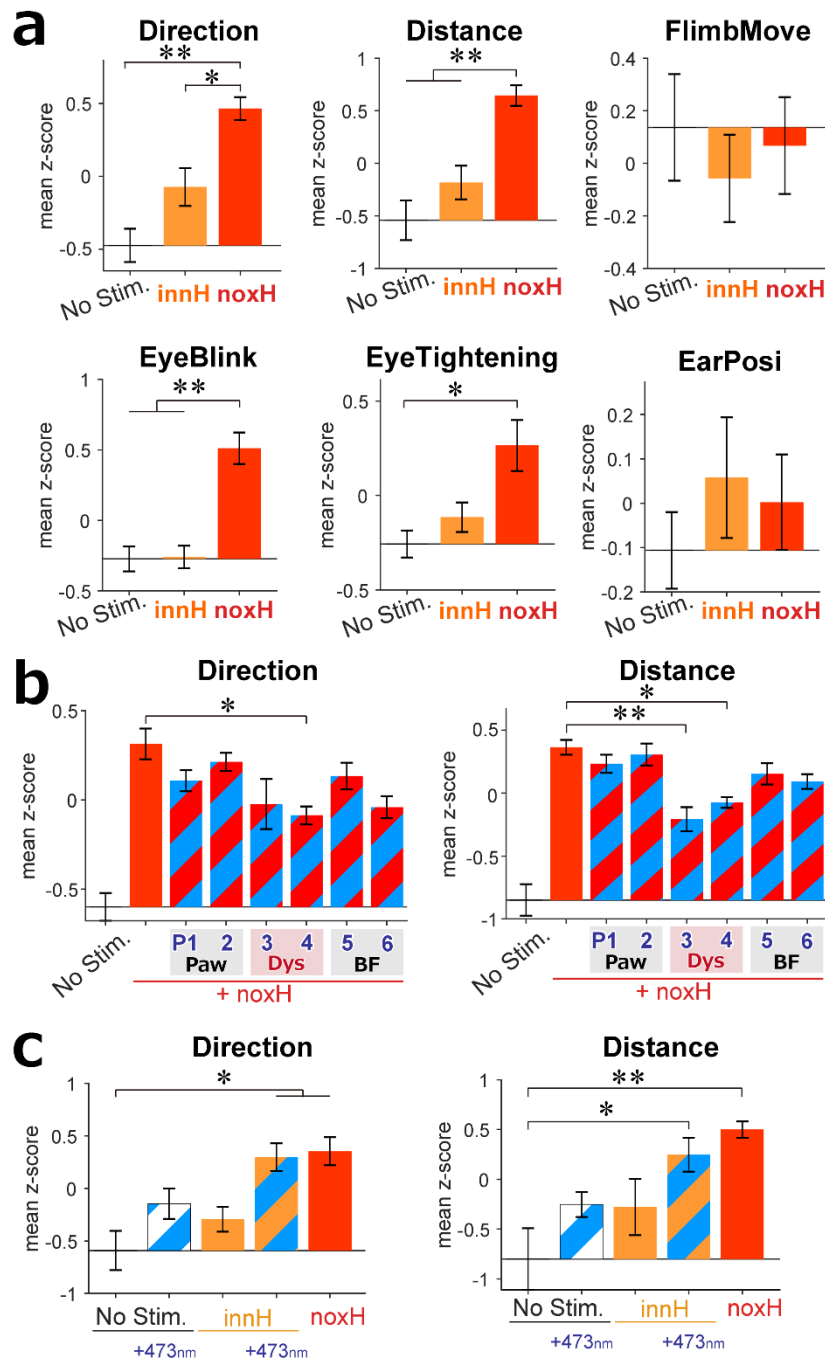

74

75 **Extended Data Fig. 7.**

76 **Nocifensive responses taken from the behavioural experiment using a spherical treadmill.**

77 **a**, Indices to measure nocifensive responses to IR laser exposure for 0 (no stim), 500 (innH), and  
 78 1,500 ms (noxH). Direction, the moving direction; a high z-score indicates the animal moved  
 79 contralateral to the direction of the IR laser. Distance, the total distance traveled during 4 s after  
 80 the onset of IR laser. FlimbMove, the number of touches or covering of the left whisker pad by  
 81 the left forelimb. EyeBlink, the number of eye blinks. Eye tightening, sustained closure of left

Osaki et al., (Extended Data Figures)

82 eyelid. Error bars indicate SEMs ( $n = 6$ ). **b**, Study of the activation of PV interneurons in different  
83 anatomical positions ( $n = 6$ ). **c**, Indices of the activation of thalamocortical fiber from Po after IR  
84 laser stimulation ( $n = 3$ ).  $*P < 0.05$ ,  $**P < 0.01$  by one-way ANOVA followed by Tukey–Kramer  
85 test.

Osaki et al., (Extended Data Figures)

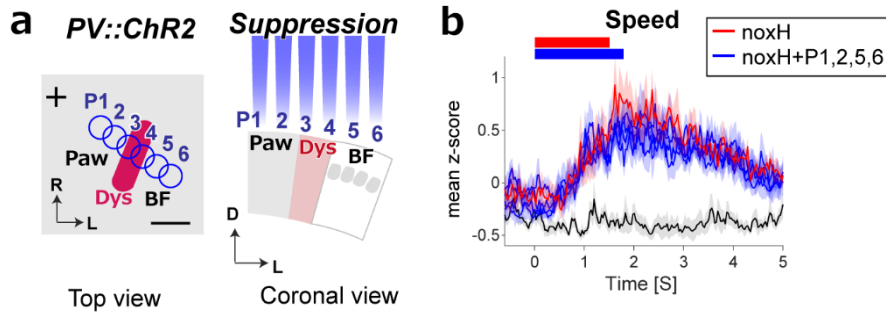

86

Top view

Coronal view

87

**Extended Data Fig. 8.**

88

**Blue light stimulation of BF did not reduce escape speed.**

89

**a**, Same setup as shown in Fig. 4e. **b**, Blue light stimulation of P1, 2, 5, and 6 did not reduce the escape speed to noxH. The difference between the IR-only condition and P1, 2, 5, 6 activation combined with IR stimulation was statistically insignificant at all time points (one-way ANOVA followed by Tukey–Kramer test).

92

93

Osaki et al., (Extended Data Figures)

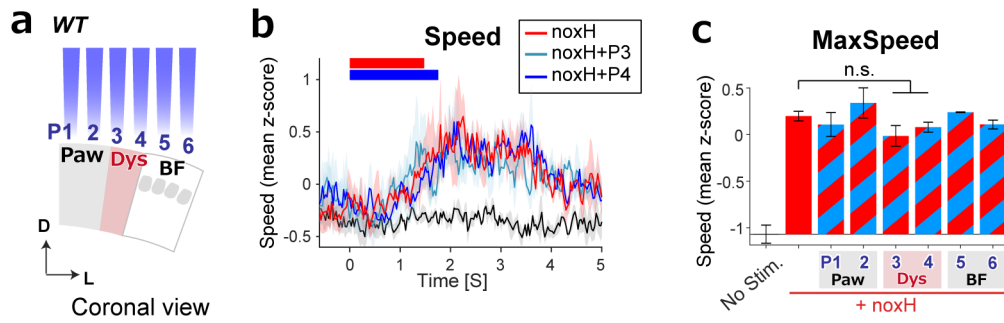

94

95 **Extended Data Fig. 9.**

96 **Blue light stimulation of Dys in control animals did not reduce the escape speed.**

97 **a**, Same setup as shown in Fig. 4e but in Chr2-negative wild-type (WT) animals. **b**, Blue light  
98 stimulations of P3 and 4 did not reduce the escape speed in WT mice ( $n = 3$ ). **c**, Blue light  
99 stimulation at any position did not affect MaxSpeed (one-way ANOVA followed by Tukey-  
100 Kramer test).

Osaki et al., (Extended Data Figures)

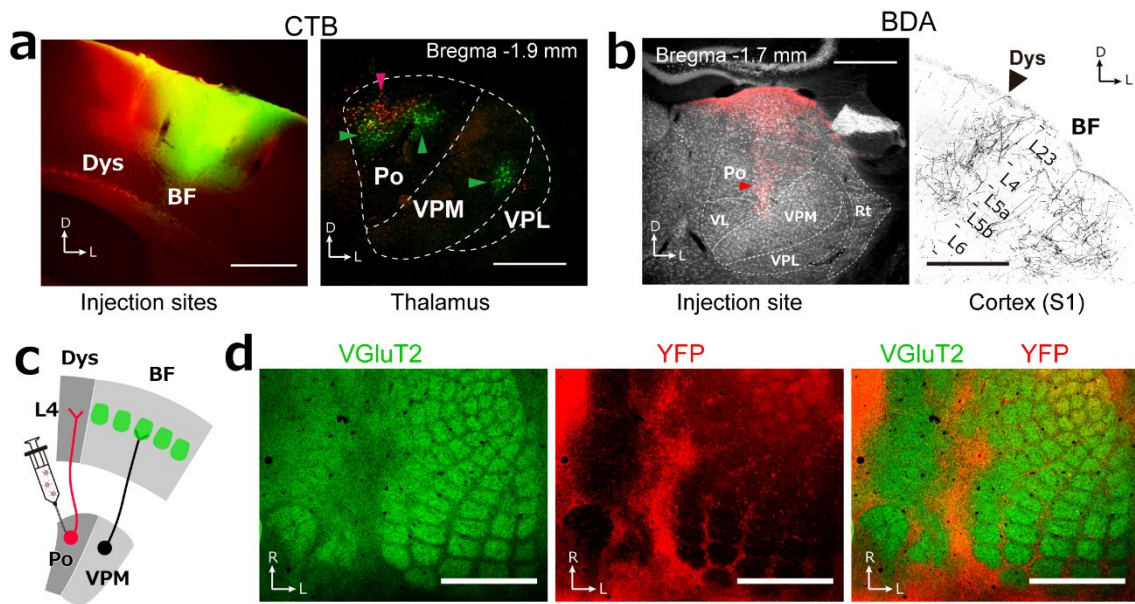

101

102

**Extended Data Fig. 10.**

103

**Dys receives input from the posterior medial thalamic nucleus.**

104

**a**, Retrograde labeling of posterior medial thalamic nucleus (Po) neurons after injection of Alexa

105

Fluor 555- and 488-labelled cholera toxin subunit B into Dys (red) and BF (green), respectively.

106

*Left*, Injection sites. *Right*, Somas of neurons projecting to Dys were observed in Po. The somas

107

of neurons projecting to BF were observed in the ventral posterior medial nucleus (VPM) and Po.

108

VPL, ventral posterior lateral nucleus. Scale bars, 500 μm. **b**, *Left*, Injection site of biotinylated

109

dextran amine (BDA), an anterograde tracer. *Right*, Axon terminals from neurons in Po. VL,

110

ventral lateral nucleus; Rt, reticular nucleus. Scale bars, 500 μm. **c**, Schema of AAV-DJ-YFP

111

injection. **d**, Tangential section of S1 L4 co-labelled with anti-vGluT2 antibody (green) and axon

112

terminals from Po (red). Scale bars, 1 mm. See also other tracer studies <sup>1,2</sup>.

113

Osaki et al., (Extended Data Figures)

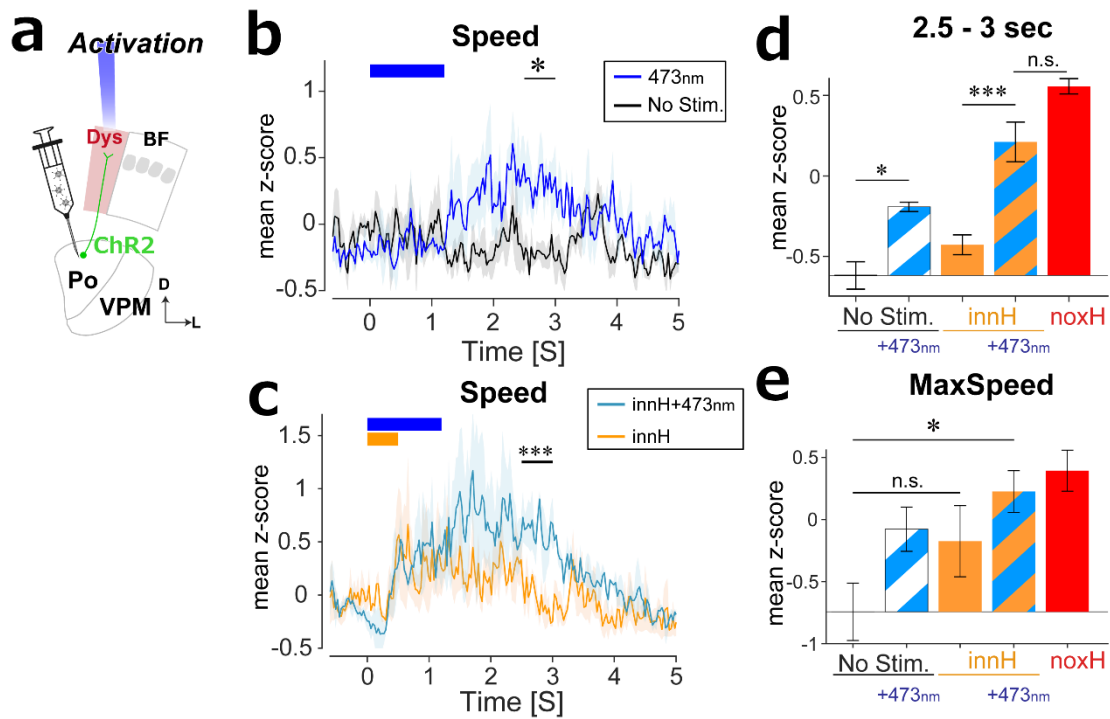

114

115 **Extended Data Fig. 11.**

116 **Optogenetical activation of thalamocortical fibers projecting to Dys induced escape**  
117 **responses.**

118 **a**, Same setup as shown in Fig. 4h. **b**, Average speed profiles with (473 nm, blue) and without

119 (No Stim, black) optogenetic activation ( $n = 3$  mice). **c**, Average speed profiles under innH

120 condition with (innH + 473nm, cyan) and without (innH, orange) optogenetic activation **d**, Mean

121 z-scores of the speed at 2.5–3 s. **e**, Means z-scores of MaxSpeed. n.s., not significant;  $*P < 0.05$ ,

122  $***P < 0.001$  by one-way ANOVA followed by Tukey–Kramer test.

123

Osaki et al., (Extended Data Figures)

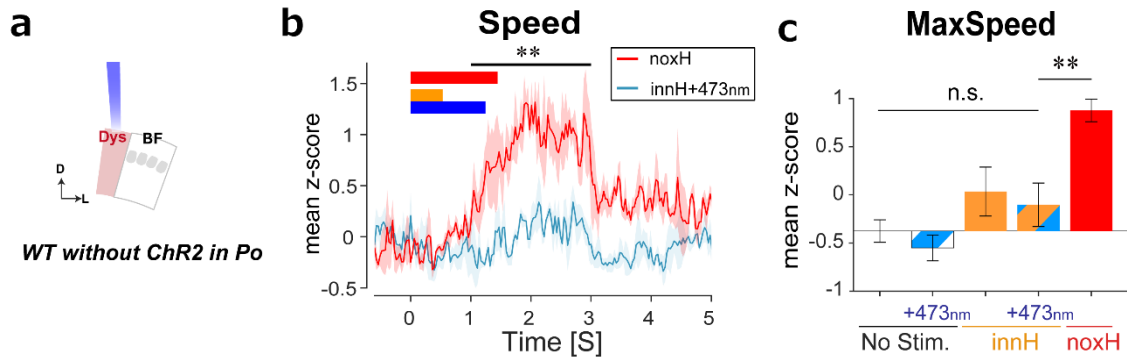

124

125

**Extended Data Fig. 12.**

126

**Blue light stimulation itself does not affect escape speed in animals not expressing ChR2.**

127

**a**, Same setup as the behavioral experiment in Fig. 4h in WT mice without AAV-ChR2 injection

128

into Po. **b**, Mean z-scores of the speed profiles under the noxH condition and innH + 473 nm

129

condition. Shading indicates SEM over three mice. **c**, Mean z-scores for maximum speed. The

130

blue light (473 nm) combined with/without IR stimulation did not increase MaxSpeed. n.s., not

131

significant;  $**P < 0.01$  by one-way ANOVA followed by Tukey–Kramer test ( $n = 3$ ).

132

Osaki et al., (Extended Data Figures)

133 **References**

- 134 1 Wimmer, V. C., Bruno, R. M., de Kock, C. P. J., Kuner, T. & Sakmann, B. Dimensions of a  
135 projection column and architecture of VPM and POm axons in rat vibrissal cortex. *Cerebral cortex*  
136 (*New York, N.Y. : 1991*) **20**, 2265-2276, doi:10.1093/cercor/bhq068 (2010).
- 137 2 Koralek, K.-A., Jensen, K. F. & Killackey, H. P. Evidence for two complementary patterns of  
138 thalamic input to the rat somatosensory cortex. *Brain Research* **463**, 346-351, doi:10.1016/0006-  
139 8993(88)90408-8 (1988).
- 140
